# Supplementary material for: Effect of metformin use on graft and patient survival in kidney transplant recipients with type 2 diabetes: a systematic review protocol
Source: PubMed Central journal article supplement — BMJ Open. 2024 May 16;14(5):e078393. doi: 10.1136/bmjopen-2023-078393 (PMC11103231; doi:10.1136/bmjopen-2023-078393), 2024-05-16
Supplement: bmjopen-2023-078393.draft_revisions.pdf [file bmjopen-2023-078393.draft_revisions.pdf]

# BMJ Open

BMJ Open is committed to open peer review. As part of this commitment we make the peer review history of every article we publish publicly available.

When an article is published we post the peer reviewers' comments and the authors' responses online. We also post the versions of the paper that were used during peer review. These are the versions that the peer review comments apply to.

The versions of the paper that follow are the versions that were submitted during the peer review process. They are not the versions of record or the final published versions. They should not be cited or distributed as the published version of this manuscript.

BMJ Open is an open access journal and the full, final, typeset and author-corrected version of record of the manuscript is available on our site with no access controls, subscription charges or pay-per-view fees (<http://bmjopen.bmj.com>).

If you have any questions on BMJ Open's open peer review process please email [info.bmjopen@bmj.com](mailto:info.bmjopen@bmj.com)

# BMJ Open

## The Effect of Metformin Use on Graft and Patient Survival in Kidney Transplant Recipients with Type 2 Diabetes: A Systematic Review Protocol

|                               |                                                                                                                                                                                                                                                                                                                                                                                                                                                                                                                                                                                                                                                                                                                                                                                                                                                                                                                                                                                                                                                                                                                                                                                                                                                                                                                                                                                                                                                                                   |
|-------------------------------|-----------------------------------------------------------------------------------------------------------------------------------------------------------------------------------------------------------------------------------------------------------------------------------------------------------------------------------------------------------------------------------------------------------------------------------------------------------------------------------------------------------------------------------------------------------------------------------------------------------------------------------------------------------------------------------------------------------------------------------------------------------------------------------------------------------------------------------------------------------------------------------------------------------------------------------------------------------------------------------------------------------------------------------------------------------------------------------------------------------------------------------------------------------------------------------------------------------------------------------------------------------------------------------------------------------------------------------------------------------------------------------------------------------------------------------------------------------------------------------|
| Journal:                      | <i>BMJ Open</i>                                                                                                                                                                                                                                                                                                                                                                                                                                                                                                                                                                                                                                                                                                                                                                                                                                                                                                                                                                                                                                                                                                                                                                                                                                                                                                                                                                                                                                                                   |
| Manuscript ID                 | bmjopen-2023-078393                                                                                                                                                                                                                                                                                                                                                                                                                                                                                                                                                                                                                                                                                                                                                                                                                                                                                                                                                                                                                                                                                                                                                                                                                                                                                                                                                                                                                                                               |
| Article Type:                 | Protocol                                                                                                                                                                                                                                                                                                                                                                                                                                                                                                                                                                                                                                                                                                                                                                                                                                                                                                                                                                                                                                                                                                                                                                                                                                                                                                                                                                                                                                                                          |
| Date Submitted by the Author: | 01-Aug-2023                                                                                                                                                                                                                                                                                                                                                                                                                                                                                                                                                                                                                                                                                                                                                                                                                                                                                                                                                                                                                                                                                                                                                                                                                                                                                                                                                                                                                                                                       |
| Complete List of Authors:     | Shamshad, Farooq; University of Alberta Faculty of Medicine & Dentistry, Division of Nephrology and Immunology<br>Tungsanga, Somkanya; University of Alberta Faculty of Medicine & Dentistry, Division of Nephrology and Immunology; Chulalongkorn University, Department of Medicine, Faculty of Medicine<br>Senior, Peter; University of Alberta Faculty of Medicine and Dentistry, Endocrinology & Metabolism<br>shojai, soroush; University of Alberta Faculty of Medicine and Dentistry, Division of Nephrology, Department of Medicine;<br>Ghimire, Anukul; University of Alberta, Medicine; University of Calgary, Division of Nephrology<br>Ye, Feng; University of Alberta, ; University of Alberta<br>Kung, Janice ; University of Alberta, John W. Scott Health Sciences Library<br>Hariramani, Vinash K.; University of Alberta Faculty of Medicine & Dentistry, Division of Nephrology and Immunology<br>Abdulrahman, Abdullah; University of Alberta Faculty of Medicine & Dentistry, Division of Nephrology and Immunology<br>Penney, Matthew; University of Alberta Faculty of Medicine & Dentistry, Division of Nephrology and Immunology<br>Sultana, Naima; University of Alberta Faculty of Medicine & Dentistry, Division of Nephrology and Immunology<br>Muneer, Shezel; University of Alberta, Medicine<br>Okpechi, Ikechi; University of Alberta<br>Bello, A; University of Alberta Faculty of Medicine & Dentistry, Division of Nephrology and Immunology |
| Keywords:                     | Renal transplantation < NEPHROLOGY, Diabetic nephropathy & vascular disease < DIABETES & ENDOCRINOLOGY, Adult nephrology < NEPHROLOGY                                                                                                                                                                                                                                                                                                                                                                                                                                                                                                                                                                                                                                                                                                                                                                                                                                                                                                                                                                                                                                                                                                                                                                                                                                                                                                                                             |
|                               |                                                                                                                                                                                                                                                                                                                                                                                                                                                                                                                                                                                                                                                                                                                                                                                                                                                                                                                                                                                                                                                                                                                                                                                                                                                                                                                                                                                                                                                                                   |

SCHOLARONE™  
Manuscripts

**Title:** The Effect of Metformin Use on Graft and Patient Survival in Kidney Transplant Recipients with Type 2 Diabetes: A Systematic Review Protocol

**Authors:** Farooq Shamshad, Somkanya Tungsanga, Peter Senior, Soroush Shojai, Anukul Ghimire, Feng Ye, Janice Y. Kung, Vinash K. Hariramani, Abdullah Abdulrahman, Matthew Penney, Naima Sultana, Shezel Muneer, Ikechi G. Okpechi, Aminu K. Bello

**Author Affiliation:**

- 1) Division of Nephrology and Immunology, Faculty of Medicine and Dentistry, University of Alberta, Edmonton, Alberta, Canada
- 2) Department of Medicine, Faculty of Medicine, Chulalongkorn University, Bangkok, Thailand
- 3) Alberta Diabetes Research Institute, Faculty of Medicine and Dentistry, University of Alberta, Edmonton, Alberta, Canada
- 4) Division of Nephrology, University of Calgary, Calgary, Alberta, Canada
- 5) John W. Scott Health Sciences Library, University of Alberta, Edmonton, Alberta, Canada.

**Author Emails:**

Farooq Shamshad<sup>1</sup> – [shamshad@ualberta.ca](mailto:shamshad@ualberta.ca); Somkanya Tungsanga<sup>1,2</sup> – [tungsang@ualberta.ca](mailto:tungsang@ualberta.ca);  
Peter Senior<sup>3</sup> – [psenior@ualberta.ca](mailto:psenior@ualberta.ca); Soroush Shojai<sup>1</sup> – [shojai@ualberta.ca](mailto:shojai@ualberta.ca); Anukul Ghimire<sup>1,4</sup> – [anukul@ualberta.ca](mailto:anukul@ualberta.ca); Feng Ye<sup>1</sup> – [fye@ualberta.ca](mailto:fye@ualberta.ca); Janice Y. Kung<sup>5</sup> – [janice.kung@ualberta.ca](mailto:janice.kung@ualberta.ca);  
Vinash Kumar Hariramani<sup>1</sup> – [vinash@ualberta.ca](mailto:vinash@ualberta.ca); Abdullah Abdulrahman<sup>1</sup> – [aaabdulr@ualberta.ca](mailto:aaabdulr@ualberta.ca); Matthew Penney<sup>1</sup> – [mjpenney@ualberta.ca](mailto:mjpenney@ualberta.ca); Naima Sultana<sup>1</sup> – [sultan13@mcmaster.ca](mailto:sultan13@mcmaster.ca); Shezel Muneer<sup>1</sup> – [shezel@ualberta.ca](mailto:shezel@ualberta.ca); Ikechi G. Okpechi<sup>1</sup> – [iokpechi@ualberta.ca](mailto:iokpechi@ualberta.ca); Aminu K. Bello<sup>1</sup> – [aminu1@ualberta.ca](mailto:aminu1@ualberta.ca)

1  
2  
3 **Address for Correspondence:**  
4

5 **Name:** Farooq Shamshad  
6

7 **Address:** Division of Nephrology and Immunology, Faculty of Medicine and Dentistry,  
8  
9

10 University of Alberta, Edmonton, Alberta, Canada  
11

12 **Email:** shamshad@ualberta.ca  
13  
14  
15  
16  
17

18 **Abstract Word Count:** 235  
19

20 **Manuscript Word Count:** 3039  
21

22 **Running Title:** The Effect of Metformin Use on Graft and Patient Survival in Kidney Transplant  
23 Recipients with Type 2 Diabetes: A Systematic Review Protocol  
24  
25

26 **Keywords:** Metformin; Kidney Transplantation; Diabetes Mellitus, Type 2; Organ  
27 Transplantation  
28  
29  
30  
31  
32  
33  
34  
35  
36  
37  
38  
39  
40  
41  
42  
43  
44  
45  
46  
47  
48  
49  
50  
51  
52  
53  
54  
55  
56  
57  
58  
59  
60

## **Abstract**

### ***Introduction:***

Metformin is a first line anti-hyperglycemic agent for Type 2 Diabetes (T2DM). In addition to glycemic control, it offers benefits related to cardiovascular health, weight neutrality, and metabolic syndrome. However, its benefits in kidney transplant recipients remain unclear. Hence, we seek to describe a protocol for a systematic review, which will assess the impact of metformin use on graft survival and mortality benefits in kidney transplant recipients.

### ***Methods:***

This protocol was guided by standards of the Preferred Reporting Items for Systematic Reviews and Meta-Analyses for Protocols 2015 (PRISMA-P 2015). We will search empirical databases such as MEDLINE, Embase, Cochrane Library, CINAHL, and Web of Science Core Collection for relevant studies conducted in kidney transplant recipients using metformin, which report outcomes related to graft and patient survival. All studies meeting these criteria in adults - and published in English – from inception to 2023 will be included in our review.

### ***Ethics and Dissemination:***

Ethical approval will not be required for this review as the data used will be extracted from already published studies with publicly accessible data. As this study will assess the impact of metformin use on graft and patient survival in kidney transplant recipients, evidence gathered through it will be disseminated using traditional approaches that includes open-access peer-reviewed publication, scientific presentations, and a report. We will also disseminate our findings to appropriate academic bodies in charge of publishing guidelines related to T2DM and transplantation.

1  
2  
3  
4  
5 **Article Summary:**  
6

7  
8 ***Strengths and Limitations:***  
9

- 10
- 11 • The focus on metformin as an exposure allows us to capture a wide range of patients with  
12 diabetes, given its place in therapy.  
13
  - 14 • Utilizing multiple reviewers when screening abstracts and full texts will allow us to  
15 capture the most relevant studies.  
16
  - 17 • We will assess the quality of studies using a tool that incorporates assessments of risk of  
18 bias across core study domains: sampling, sampling technique and size, outcome  
19 measurement, response rate, and statistical reporting.  
20
  - 21 • The search strategy will include all relevant databases for peer-reviewed literature, hence  
22 ensuring a comprehensive analysis.  
23
  - 24 • A potential limitation of this study could be heterogeneity and number of studies of low  
25 quality which could affect pooled estimates and our ability to conduct a meta-analysis.  
26  
27  
28  
29  
30  
31  
32  
33  
34  
35  
36  
37  
38  
39  
40  
41  
42  
43  
44  
45  
46  
47  
48  
49  
50  
51  
52  
53  
54  
55  
56  
57  
58  
59  
60

## Introduction:

Metformin remains the first-line anti-hyperglycemic agent indicated for type 2 diabetes mellitus (T2DM) in the general population, as the UKPDS (United Kingdom Prospective Diabetes Study) Group demonstrated that metformin may decrease the risk of diabetes-related endpoints, especially in obese patients (1). In addition to glucose-lowering effects, metformin has also been touted to enhance insulin sensitivity, thereby conferring cardiovascular benefits by improving tissue plasminogen activator (tPA) activity, along with reduction in the activation of the endothelium (a necessary step for atherogenesis) (2). As such, the UKPDS study also demonstrated a reduction in myocardial infarctions in patients treated with metformin (2). Moreover, metformin also leads to a reduction in food intake, related to changes in leptin levels and insulin sensitivity (3). Hence, metformin is thought to have benefits related to metabolic syndrome, cardiovascular protection, while remaining largely weight neutral (2). As such, there is guideline-based consensus amongst experts to use metformin as a first line agent for T2DM, barring any contraindications. In kidney transplant recipients in whom cardiovascular mortality

1  
2  
3  
4 is the leading cause of death (4), metformin appears to present itself as a reasonable  
5  
6  
7 cardioprotective option.  
8  
9

10           Nevertheless, there is some uncertainty surrounding the use of metformin – for new or  
11  
12  
13 pre-existing diabetes in kidney transplant recipients – given the lack of evidence regarding  
14  
15  
16  
17 optimal regimens of anti-hyperglycemic agents in this population (5, 6). Diabetes Canada states  
18  
19  
20 that “there is not enough evidence to support specific recommendations regarding choice of  
21  
22  
23  
24 antihyperglycemic therapy” for post-transplant diabetes mellitus. Manufacturers and guidelines  
25  
26  
27 also list poor kidney function (e.g., eGFR<30mls/min) as a barrier for its use (7). Furthermore,  
28  
29  
30 no controlled studies have been undertaken to elucidate optimal management for transplant  
31  
32  
33  
34 recipients with pre-existing diabetes (8). Early after kidney transplantation, patients with pre-  
35  
36  
37 existing T2DM may often experience difficult to manage hyperglycemia, and those without pre-  
38  
39  
40 existing diabetes may develop New Onset Diabetes After Transplantation (NODAT), also called  
41  
42  
43  
44 Post Transplant Diabetes Mellitus (PTDM). Peri-operative stress and diabetogenic effects of  
45  
46  
47 immunosuppressive medications (i.e., prednisone, calcineurin inhibitors and mTOR inhibitors),  
48  
49  
50 among other risk factors - such as coronary artery disease or smoking - can exacerbate the  
51  
52  
53  
54 problem. Nevertheless, given the anti-hyperglycemic and cardioprotective effects of metformin,  
55  
56  
57  
58  
59  
60



1  
2  
3  
4 it is important to ascertain the best management principles for the treatment of T2DM in this  
5  
6  
7 population.  
8  
9

10 Management of T2DM or hyperglycemia in the kidney transplant population may include  
11  
12  
13 insulin. Yet, there have not been any controlled head-to-head studies that have examined such  
14  
15  
16  
17 treatment strategies for glycaemic management after transplantation. Researchers have evaluated  
18  
19  
20 the use of dipeptidyl peptidase (DPP)-4 inhibitors in NODAT, and they have found them to be  
21  
22  
23  
24 safe and beneficial with respect to lowering blood glucose levels in the short term, as well as  
25  
26  
27 mitigating weight gain (9, 10). Nevertheless, these studies included a very small number of  
28  
29  
30 participants, and did not study clinically relevant outcomes of graft survival or patient mortality.  
31  
32

33  
34 Ideally, antihyperglycaemic agents used to treat T2DM in a transplant population should  
35  
36  
37 preferably not promote weight gain, since steroid use and weight gain are important risk factors  
38  
39  
40 for post-transplant diabetes. Therefore, metformin appears to be a reasonable first-line agent,  
41  
42  
43 assuming well reserved kidney and liver function. GLP-1 receptor agonist or sodium-glucose  
44  
45  
46 cotransporter-2 (SGLT2) are limited by high cost, and frequently require special authorization  
47  
48  
49 for coverage in Canada. In contrast, metformin presents itself as an economical option, covered  
50  
51  
52 through nearly all public and private plans. Furthermore, in immunosuppressed patients, the risks  
53  
54  
55  
56  
57  
58  
59  
60

1  
2  
3 of mycotic genitourinary infection with SGLT2 inhibitors may be increased, especially in kidney  
4  
5  
6  
7 transplant recipients on immunosuppressive medications (11). Lastly, guidelines recommend that  
8  
9  
10 patients at increased risk for hypoglycemia (e.g., transplant recipients with impaired hepatic or  
11  
12  
13 kidney function) or pancreas transplant recipients with graft dysfunction avoid using insulin  
14  
15  
16 secretagogues agents. It is also worth considering that patients with NODAT or those that had  
17  
18  
19 pre-existing diabetes prior to transplant will likely require insulin for diabetes control, given that  
20  
21  
22 their poor diabetic control necessitated a transplant. In this context, the addition of metformin  
23  
24  
25  
26  
27 could serve to limit incremental insulin dosing and limit its adverse effects of hypoglycemia and  
28  
29  
30 weight gain.  
31

32  
33  
34  
35 Despite the noted advantages, the hesitation to use metformin for the kidney transplant  
36  
37  
38 population may stem from the tolerability or safety of metformin when used in conjunction with  
39  
40  
41 multiple medications indicated for post-transplant care (12). Furthermore, concerns regarding  
42  
43  
44 lactic acidosis with metformin when used in patients with impaired renal function (reflecting  
45  
46  
47 decreased ability to renally excrete drugs) have also been reported (13). As such, other classes of  
48  
49  
50 antihyperglycemics such as meglitinides can be preferred due to the perceived relative safety  
51  
52  
53  
54  
55 (12). Nevertheless, it is important to consider the role of metformin in type 2 diabetic kidney  
56  
57  
58

1  
2  
3 transplant recipients. Metformin can provide cardiovascular benefits through mechanisms  
4  
5  
6  
7 detailed earlier, which may help decrease death with graft function (DWGF) (14) - a significant  
8  
9  
10 cause of mortality in kidney transplant recipients (15).  
11  
12

13  
14         Given the paucity of knowledge regarding metformin use in kidney transplant recipients,  
15  
16  
17 as well as the safety concerns with polypharmacy, we aim to conduct a systematic review of the  
18  
19  
20 literature on the use of metformin and its potential effect on graft and patient survival in kidney  
21  
22  
23 transplant recipients with T2DM.  
24  
25  
26  
27  
28  
29

### 30 **Objective:**

31  
32  
33  
34         Given that multiple observational studies (8, 16) have shown promise with metformin use  
35  
36  
37 in kidney transplant recipients with T2DM, we aim to assess the effect of metformin on graft and  
38  
39  
40 patient survival in kidney transplant recipients with T2DM.  
41  
42  
43

### 44 **Methods and Analysis:**

45  
46  
47         We used the Preferred Reporting Items for Systematic reviews and Meta-Analyses for  
48  
49  
50 Protocols 2015 (PRISMA-P 2015) to develop this protocol (17). As recommended by the  
51  
52  
53 PRISMA-P guidelines, this review protocol is registered with PROSPERO International  
54  
55  
56  
57  
58

1  
2  
3  
4 Prospective Register of Systematic Reviews on June 28, 2023: registration number

5  
6  
7 CRD42023421799. For protocol amendments, we will report the date, description of the change,

8  
9  
10 and rationale in a tabular format. These changes will not be incorporated into the protocol.

### 11 12 13 **Criteria for Considering Studies for Review**

#### 14 15 16 ***Types of Studies***

17  
18  
19  
20 We aim to include observational studies and randomized control trials (RCTs) that  
21  
22  
23 evaluated graft survival and mortality in kidney transplant recipients using metformin. We  
24  
25  
26 restricted the study to articles published in the English language only.  
27  
28  
29

#### 30 31 ***Study Population***

32  
33  
34 We will include studies that have kidney transplant only recipients over the age of 18,  
35  
36  
37 regardless of sex and ethnicity. These transplants can be of any type (living donor, deceased  
38  
39  
40 donor) and of any duration. The participants in these studies must also have a diagnosis of type 2  
41  
42  
43 diabetes (as defined in the published studies to be reviewed) either before or after the receipt of  
44  
45  
46 kidney transplantation.  
47  
48  
49  
50  
51  
52  
53

#### 54 55 ***Types of Intervention***

1  
2  
3  
4 The intervention of interest will be metformin – at any dose – for the treatment of pre-  
5  
6  
7 existing T2DM or new-onset T2DM in kidney transplant recipients. To be eligible, patients must  
8  
9  
10 be receiving treatment with metformin – at any defined daily dose – for any length of time.  
11  
12  
13 Metformin usage may be demonstrated by (but not limited to) a history of metformin fills,  
14  
15  
16 prescriptions rendered, pharmacy claims data, and hospital records. Studies must have also  
17  
18  
19 reported on at least one outcome measure to be included. Comparators may include no  
20  
21  
22 medication, lifestyle interventions, insulin, GLP-1 agonists, DPP-4 inhibitors, SGLT2 inhibitors,  
23  
24  
25 sulfonylureas, meglitinides, and thiazolidinediones. Where comparators are not included, we will  
26  
27  
28 report the outcomes of studies based on metformin alone.  
29  
30  
31

### 32 33 *Types of Outcome Measures*

34  
35  
36  
37 The primary outcomes will include graft survival (defined as survival time from the onset  
38  
39  
40 of kidney transplantation) and all-cause patient mortality. Secondary outcomes may include  
41  
42  
43 effects of metformin toxicity (e.g., abdominal pain, time to metformin discontinuation) that  
44  
45  
46 patients may experience while on metformin therapy, as defined by study authors. We aim to  
47  
48  
49 utilize the definitions for these parameters as they are defined in the selected published studies  
50  
51  
52  
53  
54 for review.  
55  
56  
57  
58  
59  
60

## **Methods**

The medical librarian (JYK) will develop and execute comprehensive searches in Ovid MEDLINE, Ovid Embase, CINAHL, Cochrane Library (via Wiley), and Web of Science Core Collection, from inception to present. Both qualitative and quantitative studies will be sought, with no limitations on study types. Searches will be limited to English language. To capture all relevant literature pertaining to metformin use and associations with adverse health outcomes in patients after undergoing kidney transplantation, relevant keywords and controlled vocabulary will be carefully selected (Supplementary Table S1). Literature search results will be uploaded to Covidence ([www.covidence.org](http://www.covidence.org)), a web-based tool, which will be used for abstract and full text screening. The reporting of this systematic review will be guided by the standards of the Preferred Reporting Items for Systematic Review and Meta-Analysis (PRISMA) Statement.

## **Data Collection and Analysis**

### ***Study selection***

We intend to use a two-stage collaborative process for screening and study selection. Firstly, two reviewers (FS & ST) will independently assess and evaluate the titles and abstracts of the retrieved studies to ensure that the population studied was kidney transplant recipients with pre-

1  
2  
3 existing or new onset T2DM. The selected articles will then be included for full-text review. In  
4  
5  
6  
7 the second stage, reviewers will assess the full-text articles to ensure that metformin was used as  
8  
9  
10 an intervention, and that one of the primary outcomes of graft survival or patient mortality was  
11  
12  
13 reported. An independent third reviewer will be utilized as an arbitrator to evaluate studies in the  
14  
15  
16 event of a disagreement of the two reviewers. In such cases, the final decision to select a study  
17  
18  
19 will then lie with the independent reviewer. We will also include reasons for exclusion of  
20  
21  
22 studies, and will exclude any studies that do not utilize metformin as an intervention. Figure 1  
23  
24  
25  
26  
27 outlines the criteria of study selection (see Appendix).  
28  
29

### 30 *Inclusion Criteria*

- 31  
32  
33 - Studies conducted in kidney transplant recipients (deceased or living donor) with pre-  
34  
35 existing or new-onset T2DM (NODAT)  
36  
37
- 38  
39 - Studies using any metformin use as the intervention  
40  
41
- 42  
43 - Studies reporting any primary outcome of graft survival or patient mortality  
44  
45
- 46  
47 - Any study design (except exclusions listed below)  
48  
49
- 50  
51 - From inception through to 2023 when the search will be conducted  
52  
53
- 54  
55 - Languages limited to English  
56  
57
- 58  
59 - Patients  $\geq$  18 years old  
60

### ***Exclusion Criteria***

- Studies in which specific outcome of interest cannot be identified or extrapolated
- Age <18 years old
- Dual organ transplants (example, pancreas and kidney transplant, liver and kidney transplant, etc.)
- Patients with a clear diagnosis of type 1 diabetes (T1DM)
- Re-transplants of the kidney (receipt of transplant on more than one occasion)
- Case reports, case series, reviews, letters to the editor, editorials
- Articles with multiple publications (those with the largest samples will be included)
- No metformin as an intervention

### ***Data Items, Data Extraction and Management***

The two reviewers (FS and ST) will be responsible for independent extraction of data, using a standard data extraction sheet on Microsoft Excel. This sheet will include the details of the selected studies. The data collected will include study type (e.g., cohort, case-control, RCTs), study characteristics (e.g., country of publication, publication year), trial size, patient characteristics (age, gender) transplant types (e.g., living donor, deceased donor), onset of diabetes (e.g., new-onset post transplantation or pre-existing T2DM), types of interventions



1  
2  
3 utilized (e.g., metformin, insulin, other oral antihyperglycemics, lifestyle interventions), relevant  
4  
5  
6  
7 parameters for subgroup analysis as outlined in this protocol (e.g., blood pressure readings, statin  
8  
9  
10 use) adverse effects experienced, duration of interventions, duration of follow-up, outcomes  
11  
12  
13 (graft survival, patient mortality) and conclusions. When multiple outcome times are reported,  
14  
15  
16  
17 the longer outcome time will be extracted. Reviewers will resolve any conflicts in data extraction  
18  
19  
20 by discussion. The independent reviewer will be responsible for the adjudication of any  
21  
22  
23 unresolved conflicts. The quality of the evidence will be assessed by the Grading of  
24  
25  
26  
27 Recommendations Assessment, Development and Evaluation working group methodology.  
28  
29

### 30 *Assessment of Risk of Bias in Included Studies*

31  
32  
33

34 For the assessment of the risk of bias, we will employ the Cochrane Risk of Bias Tool 2  
35  
36  
37 (ROB-2) (18) for RCTs and the Risk of Bias in Non-randomized Studies of Intervention  
38  
39  
40 (ROBINS-I) for non-randomized studies (19). The ROB-2 uses signalling questions to assess 5  
41  
42  
43 domains, which include risk of bias arising from randomization, risk of bias arising from  
44  
45  
46  
47 deviations from intended interventions, missing outcome data, risk of bias in measurement of  
48  
49  
50 outcomes, and risk of bias in selection of the reported results. This helps elicit an overall risk of  
51  
52  
53  
54 bias judgment for an RCT-type study.  
55  
56  
57  
58  
59  
60

1  
2  
3 The ROBINS-I preliminarily urges to consider confounding domains and co-  
4  
5  
6 interventions that could be within a study, and then proceeds to evaluate the study across 7  
8  
9  
10 domains: bias due to confounding, bias due to participant selection, bias in classification of  
11  
12  
13 interventions, bias due to deviations from intended interventions, bias from missing data, bias in  
14  
15  
16 measurement outcomes, and bias in selection of the reported result.  
17  
18  
19

20 We will also present the overall risk of bias per study in a summary table. If there is  
21  
22  
23 insufficient information to assess bias, we will assign it as 'unclear'. Finally, we will assess the  
24  
25  
26 possibility of any publication bias using a regression-based test and by visually inspecting funnel  
27  
28  
29  
30 plots.  
31  
32  
33  
34  
35  
36

### 37 *Measures of Treatment Effect*

38  
39

40 We will present dichotomous outcomes as risk ratios, and continuous outcomes as mean  
41  
42  
43 differences (MD) between the intervention and control groups. If any continuous outcomes have  
44  
45  
46 been measured in different ways across studies, we will utilize standardized MD between the  
47  
48  
49  
50 intervention and controlled groups. Finally, we will present the intervention effect of any time-  
51  
52  
53  
54  
55  
56  
57  
58  
59  
60

1  
2  
3  
4 to-event outcomes as hazard ratios. The 95% confidence intervals for all outcomes will be  
5  
6  
7 reported.

### 8 9 10 *Dealing with Missing Data*

11  
12  
13  
14 When we encounter missing or unclear data, we will attempt to contact the authors of the  
15  
16  
17 relevant study to seek data or clarify information. Further, attempts will be made to calculate any  
18  
19  
20 required parameters from the given data, as necessary and appropriate. All missing data will be  
21  
22  
23 reported in our data extraction sheet and the risk of bias assessments.

### 24 25 26 27 *Assessment of Heterogeneity*

28  
29  
30 We will assess heterogeneity between studies with respect to participant characteristics,  
31  
32  
33 intervention types, duration of intervention, donor types, and outcomes. We will test statistical  
34  
35  
36 heterogeneity using the  $\chi^2$  test and estimate the amount of heterogeneity using the  $I^2$  value.

### 37 38 39 40 *Data Synthesis*

41  
42  
43  
44 The data and study characteristics will be summarized in a table, and we will determine if  
45  
46  
47 a meta-analysis can be performed by clinical and methodological heterogeneity. Statistical  
48  
49  
50 heterogeneity will be quantified using  $I^2$  statistics in each analysis (20). If the amount of  
51  
52  
53 heterogeneity is deemed acceptable ( $I^2 < 50\%$ ), we will perform a meta-analysis to summarize  
54  
55  
56  
57  
58  
59  
60

1  
2  
3 pooled results using a random effects model (21). If the study characteristics display excessive  
4  
5  
6 heterogeneity ( $I^2 > 50\%$ ), then we will report the data descriptively, and we will provide a  
7  
8  
9 narrative synthesis of included studies using the Synthesis Without Meta-Analysis Reporting  
10  
11  
12 Guideline as a framework (22). If quantitative synthesis of data is not possible, we will present a  
13  
14  
15 narrative synthesis in a table format to summarize the findings of the appropriate studies.  
16  
17  
18

### 19 20 *Subgroup Analysis*

21  
22  
23 Subgroup analysis will be performed for the following parameters: study duration, donor  
24  
25  
26 type (living vs. deceased), NODAT, pre-existing T2DM, blood pressure, blood glucose, statin  
27  
28  
29 use, steroid use, metformin alone, metformin with other oral antihyperglycemics, and metformin  
30  
31  
32 with insulin.  
33  
34  
35

### 36 37 *Patient and Public Involvement*

38  
39  
40 As this is a retrospective study of existing data, there is no public or patient involvement  
41  
42  
43 in this study.  
44  
45  
46

### 47 48 *Ethics and Dissemination*

1  
2  
3  
4 Ethics approval will not be required for this study, as it is entirely based on pre-existing  
5  
6  
7 data from published studies. Our dissemination strategy will consist of peer reviewed  
8  
9  
10 publications, presentations, and a report.  
11  
12

### 13 Discussion

14  
15  
16  
17 Currently, there are no clinical care recommendations based upon controlled studies on  
18  
19  
20 the approach anti-hyperglycemic medication management in kidney transplant recipients with  
21  
22  
23 T2DM (8). As mentioned, patients who have pre-existing T2DM prior to their transplant, or  
24  
25  
26 those who develop it after their transplant face numerous challenges. Transplant recipients are  
27  
28  
29 predisposed to developing diabetes due to various risk factors such as post-operative stress, use  
30  
31  
32 of corticosteroids, and use of calcineurin inhibitors (23). Presently, the guidelines do not favour  
33  
34  
35 one pharmacological therapy over another in the setting of T2DM following kidney  
36  
37  
38 transplantation (24). Although some studies have shown promise regarding a glucose lowering  
39  
40  
41 effect, they have been limited by sample size, and did not study clinically relevant outcomes  
42  
43  
44 such as graft rejection or mortality (9, 10).  
45  
46  
47  
48  
49

50  
51 Ideally, the choice of therapy in T2DM affecting kidney transplant recipients should  
52  
53  
54 focus on: (1) minimizing adverse effects of medications related to graft function, (2) maintaining  
55  
56  
57  
58  
59  
60

1  
2  
3 adequate glycemic control, and (3) demonstrating a cardiovascular or overall mortality benefit.  
4  
5  
6  
7 DPP-4 inhibitors and GLP-1 agonists show promise with a glucose lowering effect in this  
8  
9  
10 population (9, 10, 25), but they have not been studied for a mortality benefit. In addition, their  
11  
12  
13 costs also remain prohibitive in the context of the Canadian drug landscape (26). Furthermore,  
14  
15  
16 other option such as sulfonylureas may not be appropriate due to the risks of hypoglycemia and  
17  
18  
19 weight gain. Insulin therapies also induce hypoglycemia and weight gain, as well as requiring  
20  
21  
22 subcutaneous injections that may be inconvenient for patients. As such, metformin may be a  
23  
24  
25 favourable option in this setting. Metformin has been used for treatment of patients with T2DM  
26  
27  
28 patients in various settings, owing to its effectiveness and other metabolic and cardiovascular  
29  
30  
31 benefits. However, due to purported concerns about lactic acidosis, especially in patients with  
32  
33  
34 reduced kidney function, there is apprehension surrounding its use in kidney transplant  
35  
36  
37 recipients. We aim to evaluate the effects of metformin in kidney transplant recipients with  
38  
39  
40 T2DM – who are likely to be on advanced antihyperglycemic regimens - by conducting  
41  
42  
43 thorough subgroup analyses, which includes appraising the effects of metformin alone,  
44  
45  
46 metformin with other oral antihyperglycemics and metformin with insulin. In addition,  
47  
48  
49 parameters that are relevant to consider accounting for graft failure from cardiovascular causes  
50  
51  
52  
53  
54  
55  
56  
57  
58  
59  
60

1  
2  
3  
4 (e.g., blood pressure, steroid use, blood glucose), which may be responsible for the majority of  
5  
6  
7 kidney transplant failures, will also be considered in our subgroup analysis in order to separate  
8  
9  
10 the effects of metformin use.

11  
12  
13 Overall, this work will aim to provide much needed information on the effects of  
14  
15  
16 metformin use in kidney transplants recipients and determine its place in the pharmacologic  
17  
18  
19 management of kidney transplant recipients with T2DM. This would be invaluable for such  
20  
21  
22 patients and clinicians, no matter the outcome. If metformin is beneficial, it will serve as an  
23  
24  
25 inexpensive option for clinicians to consider for their patients. In addition, its other benefits –  
26  
27  
28 such as weight loss, minimal hypoglycemia – could also be leveraged in its favour. On the other  
29  
30  
31 hand, if we find it to be detrimental in kidney transplant recipients, clinicians may need to pursue  
32  
33  
34 other treatment options, as it is currently often prescribed for patients with T2DM.  
35  
36  
37  
38  
39  
40  
41  
42  
43  
44  
45  
46  
47  
48  
49  
50  
51  
52  
53  
54  
55  
56  
57  
58  
59  
60

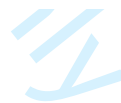

1  
2  
3  
4  
5  
6  
7  
8  
9  
10  
11  
12  
13  
14  
15  
16  
17 **Author contributions:** FS and AKB conceived the idea of the study. FS drafted the protocol  
18  
19  
20 manuscript. AKB serves as the guarantor and supervisor of the research. All authors contributed  
21  
22  
23 to the development of the protocol. FY, ST, IGK, AKB advised on the risk of bias assessment  
24  
25  
26 strategy and data extraction criteria. JYK developed the search strategy. FY provided statistical  
27  
28  
29 expertise. PS and SS provided expertise on metformin pharmacology, study design, and  
30  
31  
32 transplant medicine. All authors read, provided feedback, and approved the final manuscript.  
33  
34  
35  
36  
37 AKB is the guarantor of the study and quality assurance for the data and its analysis.  
38  
39

40 **Guarantor of Review:**

41  
42 Aminu K. Bello  
43  
44

45 **Funding or Financial Support:**

46  
47 Not required  
48  
49

50 **Competing interests:**

51  
52 None  
53  
54

55 **Acknowledgements:**  
56  
57  
58  
59  
60



1  
2  
3 None  
4

5 **Patient consent:**

6  
7 Not required  
8  
9

10 **Data sharing statement:**

11 We will make data available on request.  
12  
13  
14  
15  
16  
17  
18  
19  
20  
21  
22  
23  
24  
25  
26  
27  
28  
29  
30

31 **References:**

- 32  
33  
34
- 35 1) UK Prospective Diabetes Study (UKPDS) Group. Effect of intensive blood-glucose  
36 control with metformin on complications in overweight patients with type 2 diabetes  
37 (UKPDS 34). *Lancet*. 1998 Sep 12; 352(9131):854-65  
38  
39
  - 40  
41 2) Zilov AV, Abdelaziz SI, AlShammary A, Al Zahrani A, Amir A, Assaad Khalil SH,  
42 Brand K, Elkafrawy N, Hassoun AAK, Jahed A, Jarrah N, Mrabeti S, Paruk I.  
43 Mechanisms of action of metformin with special reference to cardiovascular protection.  
44  
45 *Diabetes Metab Res Rev*. 2019 Oct; 35(7)  
46  
47  
48  
49
  - 50 3) Malin SK, Kashyap SR. Effects of metformin on weight loss: potential mechanisms. *Curr*  
51 *Opin Endocrinol Diabetes Obes*. 2014 Oct; 21(5)  
52  
53  
54  
55  
56  
57  
58  
59

- 1  
2  
3  
4 4) Awan AA, Niu J, Pan JS, Erickson KF, Mandayam S, Winkelmayr WC, Navaneethan  
5 SD, Ramanathan V. Trends in the Causes of Death among Kidney Transplant Recipients  
6 in the United States (1996-2014). *Am J Nephrol*. 2018; 48(6):472-481  
7  
8  
9
- 10 5) Sharif A. Should metformin be our antiglycemic agent of choice post-transplantation?  
11 *Am J Transplant*. 2011 Jul; 11(7):1376-81  
12  
13  
14
- 15 6) Lo C, Jun M, Badve SV, Pilmore H, White SL, Hawley C, Cass A, Perkovic V, Zoungas  
16 S. Glucose-lowering agents for treating pre-existing and new-onset diabetes in kidney  
17 transplant recipients. *Cochrane Database Syst Rev*. 2017 Feb 27; 2(2)  
18  
19  
20  
21
- 22 7) Lazarus B, Wu A, Shin J, et al. Association of Metformin Use With Risk of Lactic  
23 Acidosis Across the Range of Kidney Function: A Community-Based Cohort  
24 Study. *JAMA Intern Med*. 2018; 178(7):903–910  
25  
26  
27  
28
- 29 8) Sharif A, Hecking M, de Vries AP, et al. Proceedings from an international consensus  
30 meeting on posttransplantation diabetes mellitus: Recommendations and future  
31 directions. *Am J Transplant* 2014; 14:1992–2000  
32  
33  
34
- 35 9) Strom Halden TA, Asberg A, Vik K, et al. Short-term efficacy and safety of sitagliptin  
36 treatment in long-term stable renal recipients with new-onset diabetes after  
37 transplantation. *Nephrol Dial Transplant* 2014; 29:926–33  
38  
39  
40  
41
- 42 10) Soliman AR, Fathy A, Khashab S, et al. Sitagliptin might be a favorable antiobesity drug  
43 for new onset diabetes after a renal transplant. *Exp Clin Transplant* 2013; 11:494–8.  
44  
45  
46
- 47 11) Khan A, El-Charabaty E, El-Sayegh S. Fungal infections in renal transplant patients. *J*  
48 *Clin Med Res*. 2015 Jun; 7(6):371-8  
49  
50  
51
- 52 12) Galindo RJ, Fried M, Breen T, Tamler R. Hyperglycemia Management in Patients with  
53 Post-Transplant Diabetes. *Endocr Pract*. 2016 Apr; 22(4):454-65  
54  
55  
56  
57  
58

- 1  
2  
3  
4 13) Stephen J, Anderson-Haag T, L, Gustafson S, Snyder J, J, Kasiske B, L, Israni A, K:  
5 Metformin Use in Kidney Transplant Recipients in the United States: An Observational  
6 Study. *Am J Nephrol* 2014; 40:546-553  
7  
8  
9
- 10 14) Yu MY, Kim YC, Lee JP, Lee H, Kim YS. Death with graft function after kidney  
11 transplantation: a single-center experience. *Clin Exp Nephrol* 2018 Jun; 22(3):710-718  
12  
13  
14
- 15 15) Prakash, J.; Ghosh, B.; Singh, S.; Soni, A.; Rathore, S. Causes of death in renal transplant  
16 recipients with functioning allograft. *Indian J Nephrol* 2012; 22(4): 264-268  
17  
18  
19
- 20 16) Vest LS, Koraiшы FM, Zhang Z, Lam NN, Schnitzler MA, Dharnidharka VR, Axelrod  
21 D, Naik AS, Alhamad TA, Kasiske BL, Hess GP, Lentine KL. Metformin use in the first  
22 year after kidney transplant, correlates, and associated outcomes in diabetic transplant  
23 recipients: A retrospective analysis of integrated registry and pharmacy claims data. *Clin*  
24 *Transplant* 2018 Aug; 32(8)  
25  
26  
27  
28  
29
- 30 17) Moher D, Shamseer L, Clarke M, et al. Preferred reporting items for systematic review  
31 and meta-analysis protocols (PRISMA-P) 2015 statement. *Systematic Reviews* 2015;  
32 4(1):1.  
33  
34  
35
- 36 18) Higgins JPT, Savović J, Page MJ, Elbers RG, Sterne JAC. Chapter 8: Assessing risk of  
37 bias in a randomized trial. In: Higgins JPT, Thomas J, Chandler J, Cumpston M, Li T,  
38 Page MJ, Welch VA (editors). *Cochrane Handbook for Systematic Reviews of*  
39 *Interventions* version 6.3 (updated February 2022). Cochrane, 2022. Available  
40 from [www.training.cochrane.org/handbook](http://www.training.cochrane.org/handbook).  
41  
42  
43  
44
- 45 19) Sterne JAC, Hernán MA, McAleenan A, Reeves BC, Higgins JPT. Chapter 25: Assessing  
46 risk of bias in a non-randomized study. In: Higgins JPT, Thomas J, Chandler J, Cumpston  
47 M, Li T, Page MJ, Welch VA (editors). *Cochrane Handbook for Systematic Reviews of*  
48 *Interventions* version 6.3 (updated February 2022). Cochrane, 2022. Available  
49 from [www.training.cochrane.org/handbook](http://www.training.cochrane.org/handbook).  
50  
51  
52  
53  
54  
55  
56  
57  
58  
59  
60

- 1  
2  
3  
4 20) Higgins JPT, Thompson SG. Quantifying heterogeneity in a meta-analysis. *Stat Med*  
5 2002; 21:1539–58.  
6  
7  
8  
9 21) DerSimonian R, Laird N. Meta-Analysis in clinical trials. *Control Clin Trials* 1986;  
10 7:177–88.  
11  
12  
13 22) Campbell M, McKenzie JE, Sowden A, et al. Synthesis without meta-analysis (swim) in  
14 systematic reviews: reporting guideline. *BMJ* 2020; 72:l6890  
15  
16  
17  
18 23) Pham PT, Pham PM, Pham SV, Pham PA, Pham PC. New onset diabetes after  
19 transplantation (NODAT): an overview. *Diabetes Metab Syndr Obes* 2011; 4:175-86.  
20  
21  
22  
23 24) Senior P, Almehtel M, Miller A, Paty B. Diabetes and Transplantation. *Can J Diabetes*  
24 (2018). S145-S149  
25  
26  
27  
28 25) Kukla A, Hill J, Merzkani M, Bentall A, Lorenz EC, Park WD, D'Costa M, Kudva YC,  
29 Stegall MD, Shah P. The Use of GLP1R Agonists for the Treatment of Type 2 Diabetes  
30 in Kidney Transplant Recipients. *Transplant Direct* 2020 Jan 13; 6(2):524.  
31  
32  
33  
34  
35 26) Lipscombe L, Booth G, Butalia S, Dasgupta K, Eurich D, Goldenberg R, Khan N,  
36 MacCallum L, Shah B, Simpson S. Pharmacologic Glycemic Management of Type 2  
37 Diabetes in Adults. *Can J Diabetes* (2018). S88-S103  
38  
39  
40  
41  
42  
43  
44  
45  
46  
47  
48  
49  
50  
51  
52  
53  
54  
55  
56  
57  
58  
59  
60

1  
2  
3  
4  
5  
6  
7  
8  
9  
10  
11  
12  
13  
14  
15  
16  
17  
18  
19  
20  
21  
22  
23  
24  
25  
26  
27  
28  
29  
30  
31  
32  
33  
34  
35  
36  
37  
38  
39  
40  
41  
42  
43  
44  
45  
46  
47  
48  
49  
50  
51  
52  
53  
54  
55  
56  
57  
58  
59  
60

For peer review only

Supplementary Table S1: Search Strategies to be used for study identification and selection

| Database                                                                                              | Search Strategy                                                                                                                                                                                                                                                                                                                                                                                                                                                                                                                                                                                                                                                    |
|-------------------------------------------------------------------------------------------------------|--------------------------------------------------------------------------------------------------------------------------------------------------------------------------------------------------------------------------------------------------------------------------------------------------------------------------------------------------------------------------------------------------------------------------------------------------------------------------------------------------------------------------------------------------------------------------------------------------------------------------------------------------------------------|
| <b>MEDLINE</b><br><br><b>Ovid</b><br><b>MEDLINE(R)</b><br><b>ALL 1946 to</b><br><b>April 14, 2023</b> | <ol style="list-style-type: none"> <li>1. (kidney adj3 transplant*).mp.</li> <li>2. (renal adj3 transplant*).mp.</li> <li>3. exp Kidney Transplantation/</li> <li>4. ((kidney or renal) and (graft* or allograft*)).mp.</li> <li>5. exp Organ Transplantation/ and exp Diabetes Mellitus, Type 2/</li> <li>6. (diabetes and (post-transplant* or posttransplant* or (after adj2 transplant*))).mp.</li> <li>7. or/1-6</li> <li>8. metformin.mp.</li> <li>9. (dimethylbiguanidine or dimethylbiguanidium or dimethylguanylguanidine or glucophage or glucovance).mp.</li> <li>10. 8 or 9</li> <li>11. 7 and 10</li> <li>12. limit 11 to english language</li> </ol> |
| <b>Embase</b><br><br><b>Ovid Embase</b><br><b>1974 to 2023</b><br><b>April 14</b>                     | <ol style="list-style-type: none"> <li>1. (kidney adj3 transplant*).mp.</li> <li>2. (renal adj3 transplant*).mp.</li> <li>3. exp kidney transplantation/</li> <li>4. ((kidney or renal) and (graft* or allograft*)).mp.</li> <li>5. exp organ transplantation/ and exp non insulin dependent diabetes mellitus/</li> <li>6. (diabetes and (post-transplant* or posttransplant* or (after adj2 transplant*))).mp.</li> <li>7. or/1-6</li> <li>8. metformin.mp.</li> <li>9. (dimethylbiguanidine or dimethylbiguanidium or dimethylguanylguanidine or glucophage or glucovance).mp.</li> <li>10. 8 or 9</li> </ol>                                                   |

|                                      |                                                                                                                                                                                                                                                                                                                                                                                                                                                                                                                                                                                                                         |
|--------------------------------------|-------------------------------------------------------------------------------------------------------------------------------------------------------------------------------------------------------------------------------------------------------------------------------------------------------------------------------------------------------------------------------------------------------------------------------------------------------------------------------------------------------------------------------------------------------------------------------------------------------------------------|
|                                      | <p>11. 7 and 10</p> <p>12. limit 11 to english language</p>                                                                                                                                                                                                                                                                                                                                                                                                                                                                                                                                                             |
| <b>CINAHL</b>                        | <p>S1 kidney N3 transplant*</p> <p>S2 renal N3 transplant*</p> <p>S3 (MH "Kidney Transplantation+")</p> <p>S4 (kidney or renal) and (graft* or allograft*)</p> <p>S5 (MH "Organ Transplantation+")</p> <p>S6 (MH "Diabetes Mellitus, Type 2")</p> <p>S7 S5 AND S6</p> <p>S8 diabetes and (post-transplant* or posttransplant* or (after N2 transplant*))</p> <p>S9 S1 OR S2 OR S3 OR S4 OR S7 OR S8</p> <p>S10 metformin</p> <p>S11 dimethylbiguanidine or dimethylbiguanidium or dimethylguanylguanidine or glucophage or glucovance</p> <p>S12 S10 OR S11</p> <p>S13 S9 AND S12</p> <p>Limitier: English language</p> |
| <b>Cochrane Library</b><br>via Wiley | <p>#1 kidney NEAR/3 transplant*</p> <p>#2 renal NEAR/3 transplant*</p> <p>#3 [mh "Kidney Transplantation"]</p> <p>#4 ((kidney or renal) and (graft* or allograft*))</p> <p>#5 [mh "Organ Transplantation"] and [mh "Diabetes Mellitus, Type 2"]</p> <p>#6 diabetes and (post-transplant* or posttransplant* or (after NEAR/2 transplant*))</p> <p>#7 {OR #1-#6}</p> <p>#8 metformin</p> <p>#9 dimethylbiguanidine or dimethylbiguanidium or dimethylguanylguanidine or glucophage or glucovance</p> <p>#10 #8 AND #9</p>                                                                                                |

|                                           |                                                                                                                                                                                                                                                                                                                                                          |
|-------------------------------------------|----------------------------------------------------------------------------------------------------------------------------------------------------------------------------------------------------------------------------------------------------------------------------------------------------------------------------------------------------------|
|                                           | #11 #7 AND #10                                                                                                                                                                                                                                                                                                                                           |
| <b>Web of Science<br/>Core Collection</b> | TS=((kidney NEAR/3 transplant*) or (renal NEAR/3 transplant*) or ((kidney or renal) and (graft* or allograft*)) or (diabetes and (post-transplant* or posttransplant* or (after NEAR/2 transplant*)))) AND TS=(metformin or dimethylbiguanidine or dimethylbiguanidium or dimethylguanylguanidine or glucophage or glucovance)<br><br>Languages: English |
| <b>Google Scholar</b>                     | (kidney transplant OR renal transplant OR kidney graft OR renal allograft) AND (metformin OR dimethylbiguanidine OR dimethylbiguanidium OR dimethylguanylguanidine OR glucophage OR glucovance)                                                                                                                                                          |

**Figure 1: PRISMA Flowchart**



1  
2  
3  
4  
5  
6  
7  
8  
9  
10  
11  
12  
13  
14  
15  
16  
17  
18  
19  
20  
21  
22  
23  
24  
25  
26  
27  
28  
29  
30  
31  
32  
33  
34  
35  
36  
37  
38  
39  
40  
41  
42  
43  
44  
45  
46  
47  
48  
49  
50  
51  
52  
53  
54  
55  
56  
57  
58  
59  
60

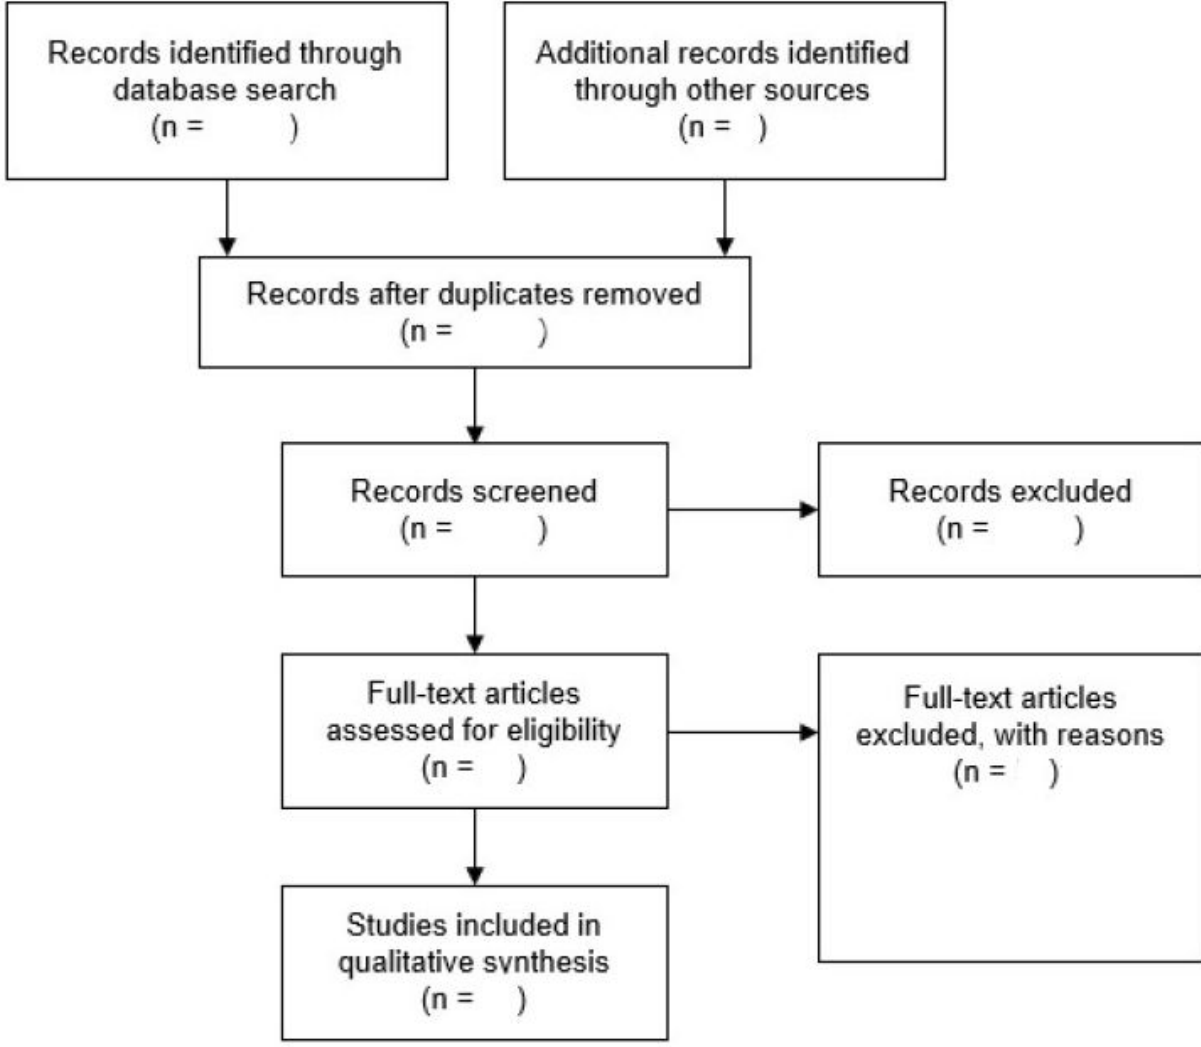

only

# Reporting checklist for protocol of a systematic review and meta analysis.

Based on the PRISMA-P guidelines.

## Instructions to authors

Complete this checklist by entering the page numbers from your manuscript where readers will find each of the items listed below.

Your article may not currently address all the items on the checklist. Please modify your text to include the missing information. If you are certain that an item does not apply, please write "n/a" and provide a short explanation.

Upload your completed checklist as an extra file when you submit to a journal.

In your methods section, say that you used the PRISMA-Reporting guidelines, and cite them as:

Moher D, Shamseer L, Clarke M, Ghersi D, Liberati A, Petticrew M, Shekelle P, Stewart LA. Preferred Reporting Items for Systematic Review and Meta-Analysis Protocols (PRISMA-P) 2015 statement. *Syst Rev.* 2015;4(1):1.

|                     |                     | Reporting Item                                                                                                                            | Page Number |
|---------------------|---------------------|-------------------------------------------------------------------------------------------------------------------------------------------|-------------|
| <b>Title</b>        |                     |                                                                                                                                           |             |
| Identification      | <a href="#">#1a</a> | Identify the report as a protocol of a systematic review                                                                                  | 1, 2        |
| Update              | <a href="#">#1b</a> | If the protocol is for an update of a previous systematic review, identify as such                                                        | N/A         |
| <b>Registration</b> |                     |                                                                                                                                           |             |
|                     | <a href="#">#2</a>  | If registered, provide the name of the registry (such as PROSPERO) and registration number                                                | 7           |
| <b>Authors</b>      |                     |                                                                                                                                           |             |
| Contact             | <a href="#">#3a</a> | Provide name, institutional affiliation, e-mail address of all protocol authors; provide physical mailing address of corresponding author | 1           |
| Contribution        | <a href="#">#3b</a> | Describe contributions of protocol authors and identify the guarantor of the review                                                       | 16          |

## Amendments

|  |                    |                                                                                                                                                                                                 |   |
|--|--------------------|-------------------------------------------------------------------------------------------------------------------------------------------------------------------------------------------------|---|
|  | <a href="#">#4</a> | If the protocol represents an amendment of a previously completed or published protocol, identify as such and list changes; otherwise, state plan for documenting important protocol amendments | 7 |
|--|--------------------|-------------------------------------------------------------------------------------------------------------------------------------------------------------------------------------------------|---|

## Support

|                           |                     |                                                                                                      |     |
|---------------------------|---------------------|------------------------------------------------------------------------------------------------------|-----|
| Sources                   | <a href="#">#5a</a> | Indicate sources of financial or other support for the review                                        | 16  |
| Sponsor                   | <a href="#">#5b</a> | Provide name for the review funder and / or sponsor                                                  | N/A |
| Role of sponsor or funder | <a href="#">#5c</a> | Describe roles of funder(s), sponsor(s), and / or institution(s), if any, in developing the protocol | N/A |

## Introduction

|            |                    |                                                                                                                                                          |     |
|------------|--------------------|----------------------------------------------------------------------------------------------------------------------------------------------------------|-----|
| Rationale  | <a href="#">#6</a> | Describe the rationale for the review in the context of what is already known                                                                            | 4-6 |
| Objectives | <a href="#">#7</a> | Provide an explicit statement of the question(s) the review will address with reference to participants, interventions, comparators, and outcomes (PICO) | 7   |

## Methods

|                                   |                      |                                                                                                                                                                                                                               |       |
|-----------------------------------|----------------------|-------------------------------------------------------------------------------------------------------------------------------------------------------------------------------------------------------------------------------|-------|
| Eligibility criteria              | <a href="#">#8</a>   | Specify the study characteristics (such as PICO, study design, setting, time frame) and report characteristics (such as years considered, language, publication status) to be used as criteria for eligibility for the review | 7-10  |
| Information sources               | <a href="#">#9</a>   | Describe all intended information sources (such as electronic databases, contact with study authors, trial registers or other grey literature sources) with planned dates of coverage                                         | 8-9   |
| Search strategy                   | <a href="#">#10</a>  | Present draft of search strategy to be used for at least one electronic database, including planned limits, such that it could be repeated                                                                                    | 20-21 |
| Study records - data management   | <a href="#">#11a</a> | Describe the mechanism(s) that will be used to manage records and data throughout the review                                                                                                                                  | 9     |
| Study records - selection process | <a href="#">#11b</a> | State the process that will be used for selecting studies (such as two independent reviewers) through each phase of the review (that is, screening, eligibility and inclusion in meta-analysis)                               | 9     |

|    |                      |                      |                                                                       |       |
|----|----------------------|----------------------|-----------------------------------------------------------------------|-------|
| 1  | Study records - data | <a href="#">#11c</a> | Describe planned method of extracting data from reports (such as      | 10    |
| 2  | collection process   |                      | piloting forms, done independently, in duplicate), any processes for  |       |
| 3  |                      |                      | obtaining and confirming data from investigators                      |       |
| 4  |                      |                      |                                                                       |       |
| 5  |                      |                      |                                                                       |       |
| 6  | Data items           | <a href="#">#12</a>  | List and define all variables for which data will be sought (such as  | 10-11 |
| 7  |                      |                      | PICO items, funding sources), any pre-planned data assumptions        |       |
| 8  |                      |                      | and simplifications                                                   |       |
| 9  |                      |                      |                                                                       |       |
| 10 |                      |                      |                                                                       |       |
| 11 | Outcomes and         | <a href="#">#13</a>  | List and define all outcomes for which data will be sought,           | 8     |
| 12 | prioritization       |                      | including prioritization of main and additional outcomes, with        |       |
| 13 |                      |                      | rationale                                                             |       |
| 14 |                      |                      |                                                                       |       |
| 15 |                      |                      |                                                                       |       |
| 16 |                      |                      |                                                                       |       |
| 17 | Risk of bias in      | <a href="#">#14</a>  | Describe anticipated methods for assessing risk of bias of individual | 11    |
| 18 | individual studies   |                      | studies, including whether this will be done at the outcome or study  |       |
| 19 |                      |                      | level, or both; state how this information will be used in data       |       |
| 20 |                      |                      | synthesis                                                             |       |
| 21 |                      |                      |                                                                       |       |
| 22 |                      |                      |                                                                       |       |
| 23 |                      |                      |                                                                       |       |
| 24 | Data synthesis       | <a href="#">#15a</a> | Describe criteria under which study data will be quantitatively       | 12-13 |
| 25 |                      |                      | synthesised                                                           |       |
| 26 |                      |                      |                                                                       |       |
| 27 |                      |                      |                                                                       |       |
| 28 | Data synthesis       | <a href="#">#15b</a> | If data are appropriate for quantitative synthesis, describe planned  | 12-13 |
| 29 |                      |                      | summary measures, methods of handling data and methods of             |       |
| 30 |                      |                      | combining data from studies, including any planned exploration of     |       |
| 31 |                      |                      | consistency (such as I <sup>2</sup> , Kendall's $\tau$ )              |       |
| 32 |                      |                      |                                                                       |       |
| 33 |                      |                      |                                                                       |       |
| 34 | Data synthesis       | <a href="#">#15c</a> | Describe any proposed additional analyses (such as sensitivity or     | 13    |
| 35 |                      |                      | subgroup analyses, meta-regression)                                   |       |
| 36 |                      |                      |                                                                       |       |
| 37 |                      |                      |                                                                       |       |
| 38 | Data synthesis       | <a href="#">#15d</a> | If quantitative synthesis is not appropriate, describe the type of    | 13    |
| 39 |                      |                      | summary planned                                                       |       |
| 40 |                      |                      |                                                                       |       |
| 41 |                      |                      |                                                                       |       |
| 42 | Meta-bias(es)        | <a href="#">#16</a>  | Specify any planned assessment of meta-bias(es) (such as              | 11    |
| 43 |                      |                      | publication bias across studies, selective reporting within studies)  |       |
| 44 |                      |                      |                                                                       |       |
| 45 |                      |                      |                                                                       |       |
| 46 | Confidence in        | <a href="#">#17</a>  | Describe how the strength of the body of evidence will be assessed    | 11    |
| 47 | cumulative           |                      | (such as GRADE)                                                       |       |
| 48 | evidence             |                      |                                                                       |       |
| 49 |                      |                      |                                                                       |       |
| 50 |                      |                      |                                                                       |       |

None The PRISMA-P elaboration and explanation paper is distributed under the terms of the Creative Commons Attribution License CC-BY. This checklist can be completed online using <https://www.goodreports.org/>, a tool made by the [EQUATOR Network](#) in collaboration with [Penelope.ai](#)

# BMJ Open

## The Effect of Metformin Use on Graft and Patient Survival in Kidney Transplant Recipients with Type 2 Diabetes: A Systematic Review Protocol

|                                 |                                                                                                                                                                                                                                                                                                                                                                                                                                                                                                                                                                                                                                                                                                                                                                                                                                                                                                                                                                                                                                                                                                                                                                                                                                                                                                                                                                                                                                                                                   |
|---------------------------------|-----------------------------------------------------------------------------------------------------------------------------------------------------------------------------------------------------------------------------------------------------------------------------------------------------------------------------------------------------------------------------------------------------------------------------------------------------------------------------------------------------------------------------------------------------------------------------------------------------------------------------------------------------------------------------------------------------------------------------------------------------------------------------------------------------------------------------------------------------------------------------------------------------------------------------------------------------------------------------------------------------------------------------------------------------------------------------------------------------------------------------------------------------------------------------------------------------------------------------------------------------------------------------------------------------------------------------------------------------------------------------------------------------------------------------------------------------------------------------------|
| Journal:                        | <i>BMJ Open</i>                                                                                                                                                                                                                                                                                                                                                                                                                                                                                                                                                                                                                                                                                                                                                                                                                                                                                                                                                                                                                                                                                                                                                                                                                                                                                                                                                                                                                                                                   |
| Manuscript ID                   | bmjopen-2023-078393.R1                                                                                                                                                                                                                                                                                                                                                                                                                                                                                                                                                                                                                                                                                                                                                                                                                                                                                                                                                                                                                                                                                                                                                                                                                                                                                                                                                                                                                                                            |
| Article Type:                   | Protocol                                                                                                                                                                                                                                                                                                                                                                                                                                                                                                                                                                                                                                                                                                                                                                                                                                                                                                                                                                                                                                                                                                                                                                                                                                                                                                                                                                                                                                                                          |
| Date Submitted by the Author:   | 07-Feb-2024                                                                                                                                                                                                                                                                                                                                                                                                                                                                                                                                                                                                                                                                                                                                                                                                                                                                                                                                                                                                                                                                                                                                                                                                                                                                                                                                                                                                                                                                       |
| Complete List of Authors:       | Shamshad, Farooq; University of Alberta Faculty of Medicine & Dentistry, Division of Nephrology and Immunology<br>Tungsanga, Somkanya; University of Alberta Faculty of Medicine & Dentistry, Division of Nephrology and Immunology; Chulalongkorn University, Department of Medicine, Faculty of Medicine<br>Senior, Peter; University of Alberta Faculty of Medicine and Dentistry, Endocrinology & Metabolism<br>shojai, soroush; University of Alberta Faculty of Medicine and Dentistry, Division of Nephrology, Department of Medicine;<br>Ghimire, Anukul; University of Alberta, Medicine; University of Calgary, Division of Nephrology<br>Ye, Feng; University of Alberta, ; University of Alberta<br>Kung, Janice ; University of Alberta, John W. Scott Health Sciences Library<br>Hariramani, Vinash K.; University of Alberta Faculty of Medicine & Dentistry, Division of Nephrology and Immunology<br>Abdulrahman, Abdullah; University of Alberta Faculty of Medicine & Dentistry, Division of Nephrology and Immunology<br>Penney, Matthew; University of Alberta Faculty of Medicine & Dentistry, Division of Nephrology and Immunology<br>Sultana, Naima; University of Alberta Faculty of Medicine & Dentistry, Division of Nephrology and Immunology<br>Muneer, Shezel; University of Alberta, Medicine<br>Okpechi, Ikechi; University of Alberta<br>Bello, A; University of Alberta Faculty of Medicine & Dentistry, Division of Nephrology and Immunology |
| <b>Primary Subject Heading</b>: | Renal medicine                                                                                                                                                                                                                                                                                                                                                                                                                                                                                                                                                                                                                                                                                                                                                                                                                                                                                                                                                                                                                                                                                                                                                                                                                                                                                                                                                                                                                                                                    |
| Secondary Subject Heading:      | Diabetes and endocrinology                                                                                                                                                                                                                                                                                                                                                                                                                                                                                                                                                                                                                                                                                                                                                                                                                                                                                                                                                                                                                                                                                                                                                                                                                                                                                                                                                                                                                                                        |
| Keywords:                       | Renal transplantation < NEPHROLOGY, Diabetic nephropathy & vascular disease < DIABETES & ENDOCRINOLOGY, Adult nephrology < NEPHROLOGY                                                                                                                                                                                                                                                                                                                                                                                                                                                                                                                                                                                                                                                                                                                                                                                                                                                                                                                                                                                                                                                                                                                                                                                                                                                                                                                                             |
|                                 |                                                                                                                                                                                                                                                                                                                                                                                                                                                                                                                                                                                                                                                                                                                                                                                                                                                                                                                                                                                                                                                                                                                                                                                                                                                                                                                                                                                                                                                                                   |

1  
2  
3  
4  
5  
6  
7  
8  
9  
10  
11  
12  
13  
14  
15  
16  
17  
18  
19  
20  
21  
22  
23  
24  
25  
26  
27  
28  
29  
30  
31  
32  
33  
34  
35  
36  
37  
38  
39  
40  
41  
42  
43  
44  
45  
46  
47  
48  
49  
50  
51  
52  
53  
54  
55  
56  
57  
58  
59  
60

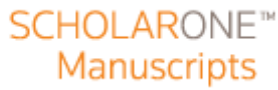

**Title:** The Effect of Metformin Use on Graft and Patient Survival in Kidney Transplant Recipients with Type 2 Diabetes: A Systematic Review Protocol

**Authors:** Farooq Shamshad, Somkanya Tungsanga, Peter Senior, Soroush Shojai, Anukul Ghimire, Feng Ye, Janice Y. Kung, Vinash K. Hariramani, Abdullah Abdulrahman, Matthew Penney, Naima Sultana, Shezel Muneer, Ikechi G. Okpechi, Aminu K. Bello

**Author Affiliation:**

- 1) Division of Nephrology and Immunology, Faculty of Medicine and Dentistry, University of Alberta, Edmonton, Alberta, Canada
- 2) Department of Medicine, Faculty of Medicine, Chulalongkorn University, Bangkok, Thailand
- 3) Alberta Diabetes Research Institute, Faculty of Medicine and Dentistry, University of Alberta, Edmonton, Alberta, Canada
- 4) Division of Nephrology, University of Calgary, Calgary, Alberta, Canada
- 5) John W. Scott Health Sciences Library, University of Alberta, Edmonton, Alberta, Canada.

**Author Emails:**

Farooq Shamshad<sup>1</sup> – [shamshad@ualberta.ca](mailto:shamshad@ualberta.ca); Somkanya Tungsanga<sup>1,2</sup> – [tungsang@ualberta.ca](mailto:tungsang@ualberta.ca);  
Peter Senior<sup>3</sup> – [psenior@ualberta.ca](mailto:psenior@ualberta.ca); Soroush Shojai<sup>1</sup> – [shojai@ualberta.ca](mailto:shojai@ualberta.ca); Anukul Ghimire<sup>1,4</sup> – [anukul@ualberta.ca](mailto:anukul@ualberta.ca); Feng Ye<sup>1</sup> – [fye@ualberta.ca](mailto:fye@ualberta.ca); Janice Y. Kung<sup>5</sup> – [janice.kung@ualberta.ca](mailto:janice.kung@ualberta.ca);  
Vinash Kumar Hariramani<sup>1</sup> – [vinash@ualberta.ca](mailto:vinash@ualberta.ca); Abdullah Abdulrahman<sup>1</sup> – [aaabdulr@ualberta.ca](mailto:aaabdulr@ualberta.ca); Matthew Penney<sup>1</sup> – [mjpenney@ualberta.ca](mailto:mjpenney@ualberta.ca); Naima Sultana<sup>1</sup> – [sultan13@mcmaster.ca](mailto:sultan13@mcmaster.ca); Shezel Muneer<sup>1</sup> – [shezel@ualberta.ca](mailto:shezel@ualberta.ca); Ikechi G. Okpechi<sup>1</sup> – [iokpechi@ualberta.ca](mailto:iokpechi@ualberta.ca); Aminu K. Bello<sup>1</sup> – [aminu1@ualberta.ca](mailto:aminu1@ualberta.ca)

1  
2  
3 **Address for Correspondence:**  
4

5 **Name:** Farooq Shamshad  
6

7 **Address:** Division of Nephrology and Immunology, Faculty of Medicine and Dentistry,  
8  
9

10 University of Alberta, Edmonton, Alberta, Canada  
11

12 **Email:** shamshad@ualberta.ca  
13  
14  
15  
16  
17

18 **Abstract Word Count:** 512  
19

20 **Manuscript Word Count:** 3523  
21

22 **Running Title:** The Effect of Metformin Use on Graft and Patient Survival in Kidney Transplant  
23 Recipients with Type 2 Diabetes: A Systematic Review Protocol  
24  
25

26 **Keywords:** Metformin; Kidney Transplantation; Diabetes Mellitus, Type 2; Organ  
27 Transplantation  
28  
29  
30  
31  
32  
33  
34  
35  
36  
37  
38  
39  
40  
41  
42  
43  
44  
45  
46  
47  
48  
49  
50  
51  
52  
53  
54  
55  
56  
57  
58  
59  
60



## **Abstract**

### ***Introduction:***

Metformin is a first line anti-hyperglycemic- agent for Type 2 Diabetes (T2DM). In addition to glycemic control, it offers benefits related to cardiovascular health, weight neutrality, and metabolic syndrome. However, its benefits in kidney transplant recipients remain unclear as metformin use is controversial in this population due to a lack of evidence and there are recommendations against its use in patients with poor kidney function. Hence, we seek to describe a protocol for a systematic review, which will assess the impact of metformin use on graft survival and mortality in kidney transplant recipients.

### ***Methods:***

This protocol was guided by standards of the Preferred Reporting Items for Systematic Reviews and Meta-Analyses for Protocols 2015 (PRISMA-P 2015). We will search empirical databases such as MEDLINE, Embase, Cochrane Library, CINAHL, and Web of Science Core Collection for relevant studies conducted in kidney transplant recipients using metformin, which report outcomes related to graft and patient survival. All studies meeting these criteria in adults and published in English from inception to 2023 will be included in our review. We will employ the Cochrane Risk of Bias Tool 2 (ROB-2) for randomized-controlled trials (RCTs) and the Risk of Bias in Non-randomized Studies of Intervention (ROBINS-I) for non-randomized studies. We will present our data and study characteristics in a table format and determine if a meta-analysis can be performed by clinical and methodological heterogeneity, using the  $I^2$  statistics. If a meta-

1  
2  
3 analysis cannot be performed, we will provide a narrative synthesis of included studies using the  
4  
5  
6  
7 Synthesis Without Meta-Analysis Reporting Guideline.  
8  
9  
10  
11

### 12 ***Ethics and Dissemination:***

14 Ethical approval will not be required for this review as the data used will be extracted  
15  
16 from already published studies with publicly accessible data. As this study will assess the impact  
17  
18 of metformin use on graft and patient survival in kidney transplant recipients, evidence gathered  
19  
20 through it will be disseminated using traditional approaches that includes open-access peer-  
21  
22 reviewed publication, scientific presentations, and a report. We will also disseminate our  
23  
24 findings to appropriate academic bodies in charge of publishing guidelines related to T2DM and  
25  
26 transplantation, as well as patient and research centered groups.  
27  
28  
29

### 30 **Article Summary:**

#### 31 ***Strengths and Limitations:***

- 32  
33  
34  
35 • The focus on metformin as an exposure allows us to capture a wide range of patients with  
36  
37 diabetes, as it is commonly prescribed as a 1<sup>st</sup>-line agent or as an adjunct with other  
38  
39 therapy.  
40  
41
- 42 • Utilizing multiple reviewers when screening abstracts and full texts will allow us to  
43  
44 capture the most relevant studies.  
45  
46
- 47 • We will assess the quality of studies using a tool that incorporates assessments of risk of  
48  
49 bias across core study domains: sampling, sampling technique and size, outcome  
50  
51 measurement, response rate, and statistical reporting.  
52  
53  
54  
55  
56  
57  
58  
59  
60

- This study could potentially be subject to language bias, as we excluded any non-English studies.
- The inclusion of observational studies may impact the strength of evidence generated from this review.

### **Introduction:**

Metformin remains the first-line anti-hyperglycemic agent indicated for type 2 diabetes mellitus (T2DM) in the general population, as the UKPDS (United Kingdom Prospective Diabetes Study) Group demonstrated that metformin may decrease the risk of diabetes-related endpoints, especially in obese patients (1). The primary action of metformin appears to involve the inhibition of the mitochondrial respiratory chain necessary to generate ATP for gluconeogenesis (2). In the gut, metformin is purported to increase anaerobic glucose metabolism in enterocytes, resulting in reduced glucose uptake (2). Further, it also causes glucagon-like peptide 1 (GLP-1) release, an incretin that enhances the release of endogenous insulin in a glucose-dependent manner, leading to a reduction in plasma glucose levels (2). In addition to glucose-lowering effects, metformin has also been touted to enhance insulin sensitivity, thereby conferring cardiovascular benefits by improving tissue plasminogen activator (tPA) activity, along with reduction in the activation of the endothelium (a necessary step for

1  
2  
3 atherogenesis) (3). The UKPDS study also demonstrated a reduction in myocardial infarctions in  
4  
5  
6  
7 patients treated with metformin (3). Moreover, metformin also leads to a reduction in food  
8  
9  
10 intake, related to changes in leptin levels and insulin sensitivity (4). Hence, metformin is thought  
11  
12  
13 to have benefits related to metabolic syndrome, cardiovascular protection, while remaining  
14  
15  
16 largely weight neutral (3). As such, there is guideline-based consensus amongst experts to use  
17  
18  
19 metformin as a first line agent for T2DM, barring any contraindications. In kidney transplant  
20  
21  
22 recipients in whom cardiovascular mortality is the leading cause of death (5), metformin appears  
23  
24  
25  
26  
27 to present itself as a reasonable cardioprotective option.  
28  
29

30  
31           Nevertheless, there is some uncertainty surrounding the use of metformin – for new or  
32  
33  
34 pre-existing diabetes in kidney transplant recipients – given the lack of evidence regarding  
35  
36  
37 optimal regimens of anti-hyperglycemic agents in this population (6, 7). Diabetes Canada states  
38  
39  
40 that “there is not enough evidence to support specific recommendations regarding choice of  
41  
42  
43 antihyperglycemic therapy” for post-transplant diabetes mellitus. Manufacturers and guidelines  
44  
45  
46 also list poor kidney function (e.g., eGFR<30mls/min) as a barrier for its use (8). This stems  
47  
48  
49  
50 from the concern of lactic acidosis, which arose partly due to case reports of metformin-  
51  
52  
53 associated lactic acidosis in patients with CKD (8). Furthermore, there are limited controlled  
54  
55  
56  
57  
58  
59  
60

1  
2  
3 studies have been undertaken to elucidate optimal management for transplant recipients with pre-  
4  
5  
6  
7 existing diabetes (9). Early after kidney transplantation, patients with pre-existing T2DM may  
8  
9  
10 often experience difficult to manage hyperglycemia, and those without pre-existing diabetes may  
11  
12  
13 develop New Onset Diabetes After Transplantation (NODAT), also called Post Transplant  
14  
15  
16 Diabetes Mellitus (PTDM). Peri-operative stress and diabetogenic effects of immunosuppressive  
17  
18  
19 medications (i.e., prednisone, calcineurin inhibitors and mTOR inhibitors), among other risk  
20  
21  
22 factors, such as coronary artery disease or smoking, can exacerbate the problem. Nevertheless,  
23  
24  
25 given the anti-hyperglycemic and cardioprotective effects of metformin, it is important to  
26  
27  
28 ascertain its place in therapy for the treatment of T2DM in this population.  
29  
30  
31

32  
33  
34 Management of T2DM or hyperglycemia in the kidney transplant population may include  
35  
36  
37 insulin. Yet, there have been limited head-to-head studies that have examined such treatment  
38  
39  
40 strategies for glycaemic management after transplantation. Researchers have evaluated the use of  
41  
42  
43 dipeptidyl peptidase (DPP)-4 inhibitors in PTDM, and they have found them to be safe and  
44  
45  
46 beneficial with respect to lowering blood glucose levels in the short term, as well as mitigating  
47  
48  
49 weight gain (10, 11). Nevertheless, these studies included a very small number of participants,  
50  
51  
52  
53 and did not study clinically relevant outcomes of graft survival or patient mortality. Furthermore,  
54  
55  
56  
57  
58  
59

1  
2  
3  
4 newer agents such as GLP-1 agonists and SGLT-2 inhibitors also have limited evidence in  
5  
6  
7 PTDM. For instance, a small placebo-controlled study showed a small reduction of 0.2% in  
8  
9  
10 HbA1C with no difference in adverse events (12). Another study involving dulaglutide showed  
11  
12  
13 no improvement in glycaemic control (12).  
14  
15

16  
17 Ideally, antihyperglycemic agents used to treat T2DM in a transplant population should  
18  
19  
20 preferably not promote weight gain, nor increase the risk of metabolic syndrome and  
21  
22  
23 cardiovascular disease. In addition to this, corticosteroid use as part of post-transplant  
24  
25  
26 management is an important risk factor to consider, as it can lead to hyperglycemia and worsen  
27  
28  
29 or cause PTDM. Therefore, metformin, which appears protective against the aforementioned risk  
30  
31  
32 factors, appears to be a reasonable first-line agent assuming well reserved kidney and liver  
33  
34  
35 function. GLP-1 receptor agonist or sodium-glucose cotransporter-2 (SGLT2) are limited by  
36  
37  
38 high cost, and may require special authorization for coverage, as is the case in Canada. In  
39  
40  
41 contrast, metformin presents itself as an economical option, covered through nearly all public  
42  
43  
44 and private plans. Furthermore, in immunosuppressed patients, the risks of mycotic genitourinary  
45  
46  
47 infection with SGLT2 inhibitors may be increased, especially in kidney transplant recipients on  
48  
49  
50 immunosuppressive medications (13). Lastly, guidelines recommend that patients at increased  
51  
52  
53  
54  
55  
56  
57  
58  
59  
60

1  
2  
3 risk for hypoglycemia (e.g., transplant recipients with impaired hepatic or kidney function) or  
4  
5  
6 pancreas transplant recipients with graft dysfunction avoid using insulin secretagogues agents. It  
7  
8  
9  
10 is also worth considering that patients with PTDM or those that had pre-existing diabetes prior to  
11  
12  
13 transplant will likely require insulin for diabetes control, given that their diabetic control  
14  
15  
16 eventually led to diabetic nephropathy, which necessitated a transplant. In this context, the  
17  
18  
19 addition of metformin could serve to limit incremental insulin dosing and limit its adverse effects  
20  
21  
22  
23 of hypoglycemia and weight gain.  
24  
25  
26  
27

28  
29         Despite the noted advantages, the hesitation to use metformin for the kidney transplant  
30  
31 population may stem from the tolerability or safety of metformin when used in conjunction with  
32  
33 multiple medications indicated for post-transplant care (14). Furthermore, concerns regarding  
34  
35 lactic acidosis with metformin when used in patients with impaired renal function (reflecting  
36  
37 decreased ability to renally excrete drugs have also been reported (15). As such, other classes of  
38  
39 antihyperglycemics such as meglitinides can be used due to the perceived relative safety (14).  
40  
41  
42 Nevertheless, it is important to consider the role of metformin in type 2 diabetic kidney  
43  
44  
45 transplant recipients. Metformin can provide cardiovascular benefits through mechanisms  
46  
47  
48  
49  
50  
51  
52  
53  
54  
55  
56  
57  
58  
59  
60

1  
2  
3 detailed earlier, which may help decrease death with graft function (DWGF) (16) - a significant  
4  
5  
6  
7 cause of mortality in kidney transplant recipients (17).  
8  
9

10           Given the paucity of knowledge regarding metformin use in kidney transplant recipients,  
11  
12  
13 as well as the safety concerns with polypharmacy, we aim to conduct a systematic review of the  
14  
15  
16  
17 literature on the use of metformin and its potential effect on graft and patient survival in kidney  
18  
19  
20 transplant recipients with T2DM.  
21  
22

### 23 **Objective:**

24  
25  
26  
27           Given that multiple observational studies (9, 18) have shown promise with metformin use  
28  
29  
30 in kidney transplant recipients with T2DM, we aim to assess the effect of metformin on graft and  
31  
32  
33  
34 patient survival in kidney transplant recipients with T2DM.  
35  
36

### 37 **Methods and Analysis:**

38  
39  
40           This protocol was guided by the Preferred Reporting Items for Systematic reviews and  
41  
42  
43 Meta-Analyses for Protocols 2015 (PRISMA-P 2015) (19). As recommended by the PRISMA-P  
44  
45  
46 guidelines, this review protocol is registered with PROSPERO International Prospective Register  
47  
48  
49 of Systematic Reviews on June 28, 2023: registration number CRD42023421799. For protocol  
50  
51  
52  
53  
54  
55  
56  
57  
58  
59  
60



1  
2  
3 amendments, we will report the date, description of the change, and rationale in a tabular format.  
4  
5

6  
7 These changes will not be incorporated into the protocol.  
8  
9

## 10 Criteria for Considering Studies for Review

### 11 *Types of Studies*

12  
13  
14  
15  
16  
17 We aim to include observational studies and randomized control trials (RCTs) that  
18  
19  
20 evaluated graft survival and mortality in kidney transplant recipients using metformin. We  
21  
22  
23 restricted the study to articles published in the English language only, as our preliminary  
24  
25  
26 research on the topic revealed a paucity of studies regardless of the language.  
27  
28  
29

### 30 *Study Population*

31  
32  
33  
34 We will include studies that have kidney transplant only recipients over the age of 18,  
35  
36  
37 regardless of sex and ethnicity. We excluded children and adolescents from our study, as we  
38  
39  
40 intended to focus solely on the adult population. Pediatric patients may have distinct  
41  
42  
43 physiological and pharmacokinetic characteristics compared to adults. By focusing on adult  
44  
45  
46 populations, the review aims to provide more relevant and specific findings for the target  
47  
48  
49 population of adult kidney transplant recipients. The kidney transplants can be of any type  
50  
51  
52 (living donor, deceased donor) and of any duration. We excluded any dual organ transplants as  
53  
54  
55  
56  
57  
58  
59  
60

1  
2  
3 limiting the scope to kidney transplantation allows for a more focused and specific analysis of  
4  
5  
6 the effects of metformin in this context. Dual organ transplants involve additional complexities  
7  
8  
9 and variations in patient outcomes, which could introduce heterogeneity into the review. To  
10  
11  
12 maintain clarity and specificity, the decision was made to concentrate solely on kidney transplant  
13  
14 recipients. Finally, the participants in these studies must also have a diagnosis of type 2 diabetes  
15  
16  
17 (as defined in the published studies to be reviewed) either before or after the receipt of kidney  
18  
19  
20 transplantation.  
21  
22  
23  
24  
25

### 26 27 *Types of Intervention*

28  
29  
30 The intervention of interest will be metformin, at any dose, for the treatment of pre-  
31  
32  
33 existing T2DM or PTDM in kidney transplant recipients. To be eligible, patients must be  
34  
35  
36 receiving treatment with metformin at any defined daily dose for any length of time. Metformin  
37  
38  
39 usage may be demonstrated by (but not limited to) a history of metformin fills, prescriptions  
40  
41  
42 rendered, pharmacy claims data, and hospital records. Studies must have also reported on at least  
43  
44  
45 one outcome measure to be included. Comparators may include no medication, lifestyle  
46  
47  
48 interventions, insulin, GLP-1 agonists, DPP-4 inhibitors, SGLT2 inhibitors, sulfonylureas,  
49  
50  
51  
52  
53  
54  
55  
56  
57  
58  
59  
60

1  
2  
3  
4 meglitinides, and thiazolidinediones. Where comparators are not included, we will report the  
5  
6  
7 outcomes of studies based on metformin alone.  
8  
9

### 10 *Types of Outcome Measures*

11  
12  
13 The primary outcomes will include graft survival (defined as survival time from the onset  
14  
15  
16 of kidney transplantation) and all-cause patient mortality. Secondary outcomes may include  
17  
18  
19 effects of metformin toxicity (e.g., abdominal pain, time to metformin discontinuation) that  
20  
21  
22 patients may experience while on metformin therapy, as defined by study authors. We aim to  
23  
24  
25  
26  
27 utilize the definitions for these parameters as they are defined in the selected published studies  
28  
29  
30 for review.  
31  
32

### 33 Methods

34  
35  
36  
37 The medical librarian (JYK) will develop and execute comprehensive searches in Ovid  
38  
39  
40 MEDLINE, Ovid Embase, CINAHL, Cochrane Library (via Wiley), and Web of Science Core  
41  
42  
43 Collection, from inception to present. Both qualitative and quantitative studies will be sought,  
44  
45  
46  
47 with no limitations on study types. Searches will be limited to English language. To capture all  
48  
49  
50 relevant literature pertaining to metformin use and associations with adverse health outcomes in  
51  
52  
53 patients after undergoing kidney transplantation, relevant keywords and controlled vocabulary  
54  
55  
56  
57  
58  
59  
60

1  
2  
3 will be carefully selected (Supplementary Table S1). Literature search results will be uploaded to  
4  
5  
6  
7 Covidence ([www.covidence.org](http://www.covidence.org)), a web-based tool, which will be used for abstract and full text  
8  
9  
10 screening. The reporting of this systematic review will be guided by the standards of the  
11  
12  
13 Preferred Reporting Items for Systematic Review and Meta-Analysis (PRISMA) Statement.  
14  
15  
16  
17 Studies or records identified by other sources, such as through references of other texts, will not  
18  
19  
20 be under consideration for review. The planned start date for the study is April 1, 2023, and the  
21  
22  
23  
24 planned end date is August 31, 2024.  
25

## 26 **Data Collection and Analysis**

### 27 ***Study selection***

28  
29  
30  
31  
32  
33  
34 We intend to use a two-stage collaborative process for screening and study selection.  
35  
36  
37 Firstly, two reviewers (FS & ST) will independently assess and evaluate the titles and abstracts  
38  
39  
40 of the retrieved studies to ensure that the population studied was kidney transplant recipients  
41  
42  
43 with pre-existing or PTDM. The selected articles will then be included for full-text review. In the  
44  
45  
46  
47 second stage, reviewers will assess the full-text articles to ensure that metformin was used as an  
48  
49  
50 intervention, and that one of the primary outcomes of graft survival or patient mortality was  
51  
52  
53 reported. An independent third reviewer will be utilized as an arbitrator to evaluate studies in the  
54  
55  
56  
57  
58  
59  
60

1  
2  
3 event of a disagreement of the two reviewers. In such cases, the final decision to select a study  
4  
5  
6  
7 will then lie with the independent reviewer. We will also include reasons for exclusion of studies  
8  
9  
10 and will exclude any studies that do not utilize metformin as an intervention. Supplementary  
11  
12  
13 Figure 1 outlines the criteria of study selection (see Appendix).  
14  
15

### 16 ***Inclusion Criteria***

- 17
- 18
- 19
- 20 - Studies conducted in kidney transplant recipients (deceased or living donor) with pre-
- 21 existing diabetes or PTDM
- 22
- 23
- 24
- 25 - Studies using any metformin use as the intervention
- 26
- 27
- 28
- 29 - Studies reporting any primary outcome of graft survival or patient mortality
- 30
- 31
- 32 - Any study design (except exclusions listed below)
- 33
- 34
- 35 - From inception through to 2023 when the search will be conducted
- 36
- 37
- 38
- 39 - Languages limited to English
- 40
- 41
- 42 - Patients  $\geq$  18 years old
- 43
- 44

### 45 ***Exclusion Criteria***

- 46
- 47
- 48
- 49 - Studies in which specific outcome of interest cannot be identified or extrapolated
- 50
- 51
- 52 - Age <18 years old
- 53
- 54
- 55
- 56
- 57
- 58
- 59
- 60

- Dual organ transplants (example, pancreas and kidney transplant, liver and kidney transplant, etc.)
- Patients with a clear diagnosis of type 1 diabetes (T1DM)
- Re-transplants of the kidney (receipt of transplant on more than one occasion)
- Case reports, case series, reviews, letters to the editor, editorials
- Articles with multiple publications (those with the largest samples will be included)
- No metformin as an intervention

### ***Data Items, Data Extraction and Management***

The two reviewers (FS and ST) will be responsible for independent extraction of data, using a standard data extraction sheet on Microsoft Excel. This sheet will include the details of the selected studies. The data collected will include study type (e.g., cohort, case-control, RCTs), study characteristics (e.g., country of publication, publication year), trial size, patient characteristics (age, gender) transplant types (e.g., living donor, deceased donor), onset of diabetes (e.g., PTDM or pre-existing T2DM), types of interventions utilized (e.g., metformin, insulin, other oral antihyperglycemics, lifestyle interventions), relevant parameters for subgroup analysis as outlined in this protocol (e.g., blood pressure readings, statin use) adverse effects experienced, duration of interventions, duration of follow-up, outcomes (graft survival, patient

1  
2  
3 mortality) and conclusions. When multiple outcome times are reported, the longer outcome time  
4  
5  
6 will be extracted. Reviewers will resolve any conflicts in data extraction by discussion. The  
7  
8  
9 independent reviewer will be responsible for the adjudication of any unresolved conflicts. The  
10  
11  
12 quality of the evidence will be assessed by the Grading of Recommendations Assessment,  
13  
14  
15 Development and Evaluation working group methodology.  
16  
17  
18  
19

### 20 *Assessment of Risk of Bias in Included Studies*

21  
22

23  
24 For the assessment of the risk of bias, we will employ the Cochrane Risk of Bias Tool 2  
25  
26 (ROB-2) (20) for RCTs and the Risk of Bias in Non-randomized Studies of Intervention  
27  
28 (ROBINS-I) for non-randomized studies (21). The ROB-2 uses signalling questions to assess 5  
29  
30  
31 domains, which include risk of bias arising from randomization, risk of bias arising from  
32  
33  
34 deviations from intended interventions, missing outcome data, risk of bias in measurement of  
35  
36  
37 outcomes, and risk of bias in selection of the reported results. This helps elicit an overall risk of  
38  
39  
40 bias judgment for an RCT-type study.  
41  
42  
43  
44  
45

46  
47 The ROBINS-I preliminarily urges to consider confounding domains and co-  
48  
49  
50 interventions that could be within a study, and then proceeds to evaluate the study across 7  
51  
52  
53 domains: bias due to confounding, bias due to participant selection, bias in classification of  
54  
55  
56  
57  
58  
59  
60

1  
2  
3 interventions, bias due to deviations from intended interventions, bias from missing data, bias in  
4  
5  
6 measurement outcomes, and bias in selection of the reported result.  
7  
8  
9

10 We will also present the overall risk of bias per study in a summary table. If there is  
11  
12 insufficient information to assess bias, we will assign it as 'unclear'. Finally, we will assess the  
13  
14 possibility of any publication bias using a regression-based test and by the examination of the  
15  
16 resultant funnel plots.  
17  
18  
19  
20  
21  
22

### 23 *Measures of Treatment Effect*

24  
25 We will present dichotomous outcomes as risk ratios, and continuous outcomes as mean  
26  
27 differences (MD) between the intervention and control groups. If any continuous outcomes have  
28  
29 been measured in different ways across studies, we will utilize standardized MD between the  
30  
31 intervention and controlled groups. Finally, we will present the intervention effect of any time-  
32  
33 to-event outcomes as hazard ratios. The 95% confidence intervals for all outcomes will be  
34  
35 reported.  
36  
37  
38  
39  
40  
41  
42  
43  
44  
45

### 46 *Dealing with Missing Data*

47  
48  
49 When we encounter missing or unclear data, we will attempt to contact the authors of the  
50  
51 relevant study to seek data or clarify information. Further, attempts will be made to calculate any  
52  
53  
54  
55  
56  
57  
58  
59  
60



1  
2  
3  
4 required parameters from the given data, as necessary and appropriate. All missing data will be  
5  
6  
7 reported in our data extraction sheet and the risk of bias assessments.  
8  
9

### 10 *Assessment of Heterogeneity*

11  
12  
13 We will assess heterogeneity between studies with respect to participant characteristics,  
14  
15  
16  
17 intervention types, duration of intervention, donor types, and outcomes. We will test statistical  
18  
19  
20 heterogeneity using the  $\chi^2$  test and estimate the amount of heterogeneity using the  $I^2$  value.  
21  
22

### 23 *Data Synthesis*

24  
25  
26  
27 The data and study characteristics will be summarized in a table, and we will determine if  
28  
29  
30 a meta-analysis can be performed by clinical and methodological heterogeneity. Statistical  
31  
32  
33 heterogeneity will be quantified using  $I^2$  statistics in each analysis (22). If the extent of  
34  
35  
36 heterogeneity is deemed acceptable ( $I^2 < 50\%$ ) based on previous works, we will perform a meta-  
37  
38  
39 analysis to summarize pooled results using a random effects model (23). If the study  
40  
41  
42 characteristics display excessive heterogeneity ( $I^2 > 50\%$ ), then we will report the data  
43  
44  
45 descriptively, and we will provide a narrative synthesis of included studies using the Synthesis  
46  
47  
48 Without Meta-Analysis Reporting Guideline as a framework (24). If quantitative synthesis of  
49  
50  
51  
52  
53  
54  
55  
56  
57  
58  
59  
60

1  
2  
3  
4 data is not possible, we will present a narrative synthesis in a table format to summarize the  
5  
6  
7 findings of the appropriate studies.  
8  
9

### 10 *Subgroup Analysis*

11  
12  
13 Subgroup analysis will be performed for the following parameters: study duration, donor  
14  
15  
16 type (living vs. deceased), PTDM, pre-existing T2DM, blood pressure, blood glucose, statin use,  
17  
18  
19 steroid use, metformin alone, metformin with other oral antihyperglycemics, and metformin with  
20  
21  
22 insulin.  
23  
24  
25

### 26 *Patient and Public Involvement*

27  
28  
29 We will be providing our findings to a Canadian research initiative known as CanSOLVE  
30  
31  
32  
33 CKD, which comprises of patients, healthcare providers, and researchers collaborating to  
34  
35  
36  
37 transform the care received by patients affected by chronic kidney disease. In addition, we will  
38  
39  
40 also share our results with Diabetes Action Canada, a non-profit organization made of patient-  
41  
42  
43 partners, researchers and healthcare providers that execute research projects benefiting patients  
44  
45  
46 living with diabetes.  
47  
48  
49

### 50 *Ethics and Dissemination*

1  
2  
3  
4 Ethics approval will not be required for this study, as it is entirely based on pre-existing  
5  
6  
7 data from published studies. Our dissemination strategy will consist of peer reviewed  
8  
9  
10 publications, presentations, and a report. We will disseminate our findings to major  
11  
12  
13 organizations, patients, and professional societies such as the International Diabetes Federation  
14  
15  
16 (IDF), International Society of Nephrology (ISN), Diabetes Canada, Kidney Foundation of  
17  
18  
19 Canada and related patient organizations and professional bodies.  
20  
21  
22

## 23 Discussion

24  
25  
26  
27 Currently, there are no clinical care recommendations based upon controlled studies on  
28  
29  
30 the approach to anti-hyperglycemic medication management in kidney transplant recipients with  
31  
32  
33 T2DM (9). As mentioned, patients who have pre-existing T2DM prior to their transplant, or  
34  
35  
36 those who develop it after their transplant face numerous challenges. Transplant recipients are  
37  
38  
39 predisposed to developing diabetes due to various risk factors such as post-operative stress, use  
40  
41  
42 of corticosteroids, and use of calcineurin inhibitors (25). Presently, the guidelines do not favour  
43  
44  
45 one pharmacological therapy over another in the setting of T2DM following kidney  
46  
47  
48 transplantation (26). Although some studies have shown promise regarding a glucose lowering  
49  
50  
51  
52  
53  
54  
55  
56  
57  
58  
59  
60

1  
2  
3 effect, they have been limited by sample size, and did not study clinically relevant outcomes  
4  
5  
6  
7 such as graft rejection or mortality (10, 11).  
8  
9

10           Ideally, the choice of therapy in T2DM affecting kidney transplant recipients should  
11  
12 focus on: (1) minimizing adverse effects of medications related to graft function, (2) maintaining  
13  
14 adequate glycemic control, and (3) demonstrating a cardiovascular or overall mortality benefit.  
15  
16  
17 DPP-4 inhibitors and GLP-1 agonists show promise with a glucose lowering effect in this  
18  
19 population (10, 11, 27), but they have not been studied for a mortality benefit. In addition, they  
20  
21 are expensive agents and can be limited by cost (28). Furthermore, other options such as  
22  
23  
24 sulfonylureas may not be appropriate due to the risks of hypoglycemia and weight gain. Insulin  
25  
26  
27 therapies also induce hypoglycemia and weight gain, as well as requiring subcutaneous  
28  
29  
30 injections that may be inconvenient for patients. As such, metformin may be a favourable option  
31  
32  
33 in this setting. Metformin has been used for treatment of patients with T2DM patients in various  
34  
35  
36 settings, owing to its effectiveness and other metabolic and cardiovascular benefits. However,  
37  
38  
39 due to purported concerns about lactic acidosis, especially in patients with reduced kidney  
40  
41  
42 function, there is apprehension surrounding its use in kidney transplant recipients. We aim to  
43  
44  
45  
46  
47  
48  
49  
50  
51  
52  
53  
54 evaluate the effects of metformin in kidney transplant recipients with T2DM, who are likely to  
55  
56  
57  
58  
59  
60

1  
2  
3 be on advanced antihyperglycemic regimens, by conducting thorough subgroup analyses, which  
4  
5  
6 includes appraising the effects of metformin alone, metformin with other oral  
7  
8  
9 antihyperglycemics and metformin with insulin. In addition, other parameters that are relevant to  
10  
11  
12 consider include accounting for graft failure from cardiovascular causes (e.g., blood pressure,  
13  
14  
15 steroid use, blood glucose), which may be responsible for the majority of kidney transplant  
16  
17  
18 failures. As such, this will also be included in our subgroup analysis in order to separate the  
19  
20  
21 effects of metformin use alone.  
22  
23  
24  
25

26  
27 Overall, this work will aim to provide much needed information on the effects of  
28  
29  
30 metformin use in kidney transplant recipients and determine its place in the pharmacologic  
31  
32  
33 management of kidney transplant recipients with T2DM. Currently, there are limited studies on  
34  
35  
36 this topic in the literature. An evaluation of the literature via a systematic review will be helpful  
37  
38  
39 in assessing their overall conclusions. This would be invaluable for such patients and clinicians,  
40  
41  
42 no matter the outcome. If metformin is beneficial to positively impact patient-relevant outcomes  
43  
44  
45 in the study, the information may inform guideline recommendations for the use of this agent as  
46  
47  
48 an inexpensive option for clinicians to consider for their patients with diabetes and kidney  
49  
50  
51 transplant. In addition, its other benefits, such as weight loss or minimal hypoglycemia, could  
52  
53  
54  
55  
56  
57  
58  
59  
60

1  
2  
3 also be leveraged in its favour. On the other hand, if we find metformin to be detrimental in  
4  
5  
6  
7 kidney transplant recipients, clinicians may need to pursue other treatment options, as metformin  
8  
9  
10 is currently often prescribed for patients with T2DM.  
11  
12

13 **Author contributions:** FS and AKB conceived the idea of the study. FS drafted the protocol  
14  
15  
16 manuscript. AKB serves as the guarantor and supervisor of the research. All authors contributed  
17  
18  
19 to the development of the protocol. FY, ST, IGO, AKB advised on the risk of bias assessment  
20  
21  
22 strategy and data extraction criteria. JYK developed the search strategy. FY provided statistical  
23  
24  
25 expertise and data analysis. PS and SS provided expertise on metformin pharmacology, study  
26  
27  
28 design, and transplant medicine. AG, VKH, AA, MP, NS, and SM provided feedback on design,  
29  
30  
31 data extraction, and thoroughly proofread the study. All authors reviewed and approved the final  
32  
33  
34 manuscript. AKB is the guarantor of the study and quality assurance for the data and its analysis.  
35  
36  
37  
38  
39

40 **Guarantor of Review:**

41  
42 Aminu K. Bello  
43

44 **Funding or Financial Support:**

45  
46 Not required  
47  
48

49 **Competing interests:**

50  
51 None  
52  
53

54 **Acknowledgements:**  
55  
56  
57  
58  
59  
60

1  
2  
3 None  
4

5 **Patient consent:**  
6

7 Not required  
8  
9

10 **Data sharing statement:**  
11

12 We will make data available on request.  
13  
14  
15  
16  
17  
18  
19  
20  
21  
22  
23  
24  
25  
26  
27

28 **References:**  
29

- 30  
31  
32 1) UK Prospective Diabetes Study (UKPDS) Group. Effect of intensive blood-glucose  
33 control with metformin on complications in overweight patients with type 2 diabetes  
34 (UKPDS 34). *Lancet*. 1998 Sep 12; 352(9131):854-65  
35  
36  
37  
38 2) Rena, G., Hardie, D.G. & Pearson, E.R. The mechanisms of action of  
39 metformin. *Diabetologia* 2017; 60:1577–1585  
40  
41  
42  
43 3) Zilov AV, Abdelaziz SI, AlShammary A, Al Zahrani A, Amir A, Assaad Khalil SH,  
44 Brand K, Elkafrawy N, Hassoun AAK, Jahed A, Jarrah N, Mrabeti S, Paruk I.  
45 Mechanisms of action of metformin with special reference to cardiovascular protection.  
46 *Diabetes Metab Res Rev*. 2019 Oct; 35(7)  
47  
48  
49  
50  
51 4) Malin SK, Kashyap SR. Effects of metformin on weight loss: potential mechanisms. *Curr*  
52 *Opin Endocrinol Diabetes Obes*. 2014 Oct; 21(5)  
53  
54  
55  
56  
57  
58  
59  
60

- 1  
2  
3  
4 5) Awan AA, Niu J, Pan JS, Erickson KF, Mandayam S, Winkelmayr WC, Navaneethan  
5 SD, Ramanathan V. Trends in the Causes of Death among Kidney Transplant Recipients  
6 in the United States (1996-2014). *Am J Nephrol*. 2018; 48(6):472-481  
7  
8  
9
- 10 6) Sharif A. Should metformin be our antiglycemic agent of choice post-transplantation?  
11 *Am J Transplant*. 2011 Jul; 11(7):1376-81  
12  
13  
14
- 15 7) Lo C, Jun M, Badve SV, Pilmore H, White SL, Hawley C, Cass A, Perkovic V, Zoungas  
16 S. Glucose-lowering agents for treating pre-existing and new-onset diabetes in kidney  
17 transplant recipients. *Cochrane Database Syst Rev*. 2017 Feb 27; 2(2)  
18  
19  
20  
21
- 22 8) Lazarus B, Wu A, Shin J, et al. Association of Metformin Use With Risk of Lactic  
23 Acidosis Across the Range of Kidney Function: A Community-Based Cohort  
24 Study. *JAMA Intern Med*. 2018; 178(7):903–910  
25  
26  
27  
28
- 29 9) Sharif A, Hecking M, de Vries AP, et al. Proceedings from an international consensus  
30 meeting on posttransplantation diabetes mellitus: Recommendations and future  
31 directions. *Am J Transplant* 2014; 14:1992–2000  
32  
33  
34
- 35 10) Strom Halden TA, Asberg A, Vik K, et al. Short-term efficacy and safety of sitagliptin  
36 treatment in long-term stable renal recipients with new-onset diabetes after  
37 transplantation. *Nephrol Dial Transplant* 2014; 29:926–33  
38  
39  
40  
41
- 42 11) Soliman AR, Fathy A, Khashab S, et al. Sitagliptin might be a favorable antiobesity drug  
43 for new onset diabetes after a renal transplant. *Exp Clin Transplant* 2013; 11:494–8.  
44  
45  
46
- 47 12) Chowdhury TA, Wahba M, Mallik R, et al. Association of British Clinical Diabetologists  
48 and Renal Association guidelines on the detection and management of diabetes post solid  
49 organ transplantation. *Diabet Med* 2021;38  
50  
51  
52
- 53 13) Khan A, El-Charabaty E, El-Sayegh S. Fungal infections in renal transplant patients. *J*  
54 *Clin Med Res*. 2015 Jun; 7(6):371-8  
55  
56  
57  
58  
59  
60



- 1  
2  
3  
4  
5  
6  
7  
8  
9  
10  
11  
12  
13  
14  
15  
16  
17  
18  
19  
20  
21  
22  
23  
24  
25  
26  
27  
28  
29  
30  
31  
32  
33  
34  
35  
36  
37  
38  
39  
40  
41  
42  
43  
44  
45  
46  
47  
48  
49  
50  
51  
52  
53  
54  
55  
56  
57  
58  
59  
60
- 14) Galindo RJ, Fried M, Breen T, Tamler R. Hyperglycemia Management in Patients with Post-Transplant Diabetes. *Endocr Pract.* 2016 Apr; 22(4):454-65
  - 15) Stephen J, Anderson-Haag T, L, Gustafson S, Snyder J, J, Kasiske B, L, Israni A, K: Metformin Use in Kidney Transplant Recipients in the United States: An Observational Study. *Am J Nephrol* 2014; 40:546-553
  - 16) Yu MY, Kim YC, Lee JP, Lee H, Kim YS. Death with graft function after kidney transplantation: a single-center experience. *Clin Exp Nephrol* 2018 Jun; 22(3):710-718
  - 17) Prakash, J.; Ghosh, B.; Singh, S.; Soni, A.; Rathore, S. Causes of death in renal transplant recipients with functioning allograft. *Indian J Nephrol* 2012; 22(4): 264-268
  - 18) Vest LS, Koraihy FM, Zhang Z, Lam NN, Schnitzler MA, Dharnidharka VR, Axelrod D, Naik AS, Alhamad TA, Kasiske BL, Hess GP, Lentine KL. Metformin use in the first year after kidney transplant, correlates, and associated outcomes in diabetic transplant recipients: A retrospective analysis of integrated registry and pharmacy claims data. *Clin Transplant* 2018 Aug; 32(8)
  - 19) Moher D, Shamseer L, Clarke M, et al. Preferred reporting items for systematic review and meta-analysis protocols (PRISMA-P) 2015 statement. *Systematic Reviews* 2015; 4(1):1.
  - 20) Higgins JPT, Savović J, Page MJ, Elbers RG, Sterne JAC. Chapter 8: Assessing risk of bias in a randomized trial. In: Higgins JPT, Thomas J, Chandler J, Cumpston M, Li T, Page MJ, Welch VA (editors). *Cochrane Handbook for Systematic Reviews of Interventions* version 6.3 (updated February 2022). Cochrane, 2022. Available from [www.training.cochrane.org/handbook](http://www.training.cochrane.org/handbook).
  - 21) Sterne JAC, Hernán MA, McAleenan A, Reeves BC, Higgins JPT. Chapter 25: Assessing risk of bias in a non-randomized study. In: Higgins JPT, Thomas J, Chandler J, Cumpston M, Li T, Page MJ, Welch VA (editors). *Cochrane Handbook for Systematic Reviews of*

1  
2  
3  
4 *Interventions* version 6.3 (updated February 2022). Cochrane, 2022. Available  
5 from [www.training.cochrane.org/handbook](http://www.training.cochrane.org/handbook).  
6  
7

8 22) Higgins JPT, Thompson SG. Quantifying heterogeneity in a meta-analysis. *Stat Med*  
9 2002; 21:1539–58.  
10  
11

12  
13 23) DerSimonian R, Laird N. Meta-Analysis in clinical trials. *Control Clin Trials* 1986;  
14 7:177–88.  
15  
16

17  
18 24) Campbell M, McKenzie JE, Sowden A, et al. Synthesis without meta-analysis (swim) in  
19 systematic reviews: reporting guideline. *BMJ* 2020; 72:l6890  
20  
21

22  
23 25) Pham PT, Pham PM, Pham SV, Pham PA, Pham PC. New onset diabetes after  
24 transplantation (NODAT): an overview. *Diabetes Metab Syndr Obes* 2011; 4:175-86.  
25  
26

27  
28 26) Senior P, Almelthel M, Miller A, Paty B. Diabetes and Transplantation. *Can J Diabetes*  
29 (2018). S145-S149  
30  
31

32  
33 27) Kukla A, Hill J, Merzkani M, Bentall A, Lorenz EC, Park WD, D'Costa M, Kudva YC,  
34 Stegall MD, Shah P. The Use of GLP1R Agonists for the Treatment of Type 2 Diabetes  
35 in Kidney Transplant Recipients. *Transplant Direct* 2020 Jan 13; 6(2):524.  
36  
37

38  
39  
40 28) Lipscombe L, Booth G, Butalia S, Dasgupta K, Eurich D, Goldenberg R, Khan N,  
41 MacCallum L, Shah B, Simpson S. Pharmacologic Glycemic Management of Type 2  
42 Diabetes in Adults. *Can J Diabetes* (2018). S88-S103  
43  
44  
45  
46  
47  
48  
49  
50  
51  
52  
53  
54  
55  
56  
57  
58  
59  
60

1  
2  
3  
4  
5  
6  
7  
8  
9  
10  
11  
12  
13  
14  
15  
16  
17  
18  
19  
20  
21  
22  
23  
24  
25  
26  
27  
28  
29  
30  
31  
32  
33  
34  
35  
36  
37  
38  
39  
40  
41  
42  
43  
44  
45  
46  
47  
48  
49  
50  
51  
52  
53  
54  
55  
56  
57  
58  
59  
60

For peer review only

Supplementary Table S1: Search Strategies to be used for study identification and selection

| Database                                                                | Search Strategy                                                                                                                                                                                                                                                                                                                                                                                                                                                                                                                                                                                                                                                                  |
|-------------------------------------------------------------------------|----------------------------------------------------------------------------------------------------------------------------------------------------------------------------------------------------------------------------------------------------------------------------------------------------------------------------------------------------------------------------------------------------------------------------------------------------------------------------------------------------------------------------------------------------------------------------------------------------------------------------------------------------------------------------------|
| <b>MEDLINE</b><br><br><b>Ovid MEDLINE(R) ALL 1946 to April 14, 2023</b> | <ol style="list-style-type: none"> <li>1. (kidney adj3 transplant*).mp.</li> <li>2. (renal adj3 transplant*).mp.</li> <li>3. exp Kidney Transplantation/</li> <li>4. ((kidney or renal) and (graft* or allograft*)).mp.</li> <li>5. exp Organ Transplantation/ and exp Diabetes Mellitus, Type 2/</li> <li>6. (diabetes and (post-transplant* or posttransplant* or (after adj2 transplant*))).mp.</li> <li>7. or/1-6</li> <li>8. metformin.mp.</li> <li>9. (dimethylbiguanidine or dimethylbiguanidium or dimethylguanylguanidine or glucophage or glucovance).mp.</li> <li>10. 8 or 9</li> <li>11. 7 and 10</li> <li>12. limit 11 to english language</li> </ol>               |
| <b>Embase</b><br><br><b>Ovid Embase 1974 to 2023 April 14</b>           | <ol style="list-style-type: none"> <li>1. (kidney adj3 transplant*).mp.</li> <li>2. (renal adj3 transplant*).mp.</li> <li>3. exp kidney transplantation/</li> <li>4. ((kidney or renal) and (graft* or allograft*)).mp.</li> <li>5. exp organ transplantation/ and exp non insulin dependent diabetes mellitus/</li> <li>6. (diabetes and (post-transplant* or posttransplant* or (after adj2 transplant*))).mp.</li> <li>7. or/1-6</li> <li>8. metformin.mp.</li> <li>9. (dimethylbiguanidine or dimethylbiguanidium or dimethylguanylguanidine or glucophage or glucovance).mp.</li> <li>10. 8 or 9</li> <li>11. 7 and 10</li> <li>12. limit 11 to english language</li> </ol> |
| <b>CINAHL</b>                                                           | <ol style="list-style-type: none"> <li>S1 kidney N3 transplant*</li> <li>S2 renal N3 transplant*</li> <li>S3 (MH "Kidney Transplantation+")</li> <li>S4 (kidney or renal) and (graft* or allograft*)</li> <li>S5 (MH "Organ Transplantation+")</li> <li>S6 (MH "Diabetes Mellitus, Type 2")</li> <li>S7 S5 AND S6</li> <li>S8 diabetes and (post-transplant* or posttransplant* or (after N2 transplant*))</li> <li>S9 S1 OR S2 OR S3 OR S4 OR S7 OR S8</li> <li>S10 metformin</li> </ol>                                                                                                                                                                                        |

|                                                 |                                                                                                                                                                                                                                                                                                                                                                                                                                                                                                                                                |
|-------------------------------------------------|------------------------------------------------------------------------------------------------------------------------------------------------------------------------------------------------------------------------------------------------------------------------------------------------------------------------------------------------------------------------------------------------------------------------------------------------------------------------------------------------------------------------------------------------|
|                                                 | <p>S11 dimethylbiguanidine or dimethylbiguanidium or dimethylguanylguanidine or glucophage or glucovance</p> <p>S12 S10 OR S11</p> <p>S13 S9 AND S12</p> <p>Limiters: English language</p>                                                                                                                                                                                                                                                                                                                                                     |
| <p><b>Cochrane Library</b></p> <p>via Wiley</p> | <p>#1 kidney NEAR/3 transplant*</p> <p>#2 renal NEAR/3 transplant*</p> <p>#3 [mh "Kidney Transplantation"]</p> <p>#4 ((kidney or renal) and (graft* or allograft*))</p> <p>#5 [mh "Organ Transplantation"] and [mh "Diabetes Mellitus, Type 2"]</p> <p>#6 diabetes and (post-transplant* or posttransplant* or (after NEAR/2 transplant*))</p> <p>#7 {OR #1-#6}</p> <p>#8 metformin</p> <p>#9 dimethylbiguanidine or dimethylbiguanidium or dimethylguanylguanidine or glucophage or glucovance</p> <p>#10 #8 AND #9</p> <p>#11 #7 AND #10</p> |
| <p><b>Web of Science Core Collection</b></p>    | <p>TS=((kidney NEAR/3 transplant* or (renal NEAR/3 transplant* or ((kidney or renal) and (graft* or allograft*)) or (diabetes and (post-transplant* or posttransplant* or (after NEAR/2 transplant*)))) AND TS=(metformin or dimethylbiguanidine or dimethylbiguanidium or dimethylguanylguanidine or glucophage or glucovance)</p> <p>Languages: English</p>                                                                                                                                                                                  |
| <p><b>Google Scholar</b></p>                    | <p>(kidney transplant OR renal transplant OR kidney graft OR renal allograft) AND (metformin OR dimethylbiguanidine OR dimethylbiguanidium OR dimethylguanylguanidine OR glucophage OR glucovance)</p>                                                                                                                                                                                                                                                                                                                                         |

**Supplementary Figure 1: PRISMA Flowchart**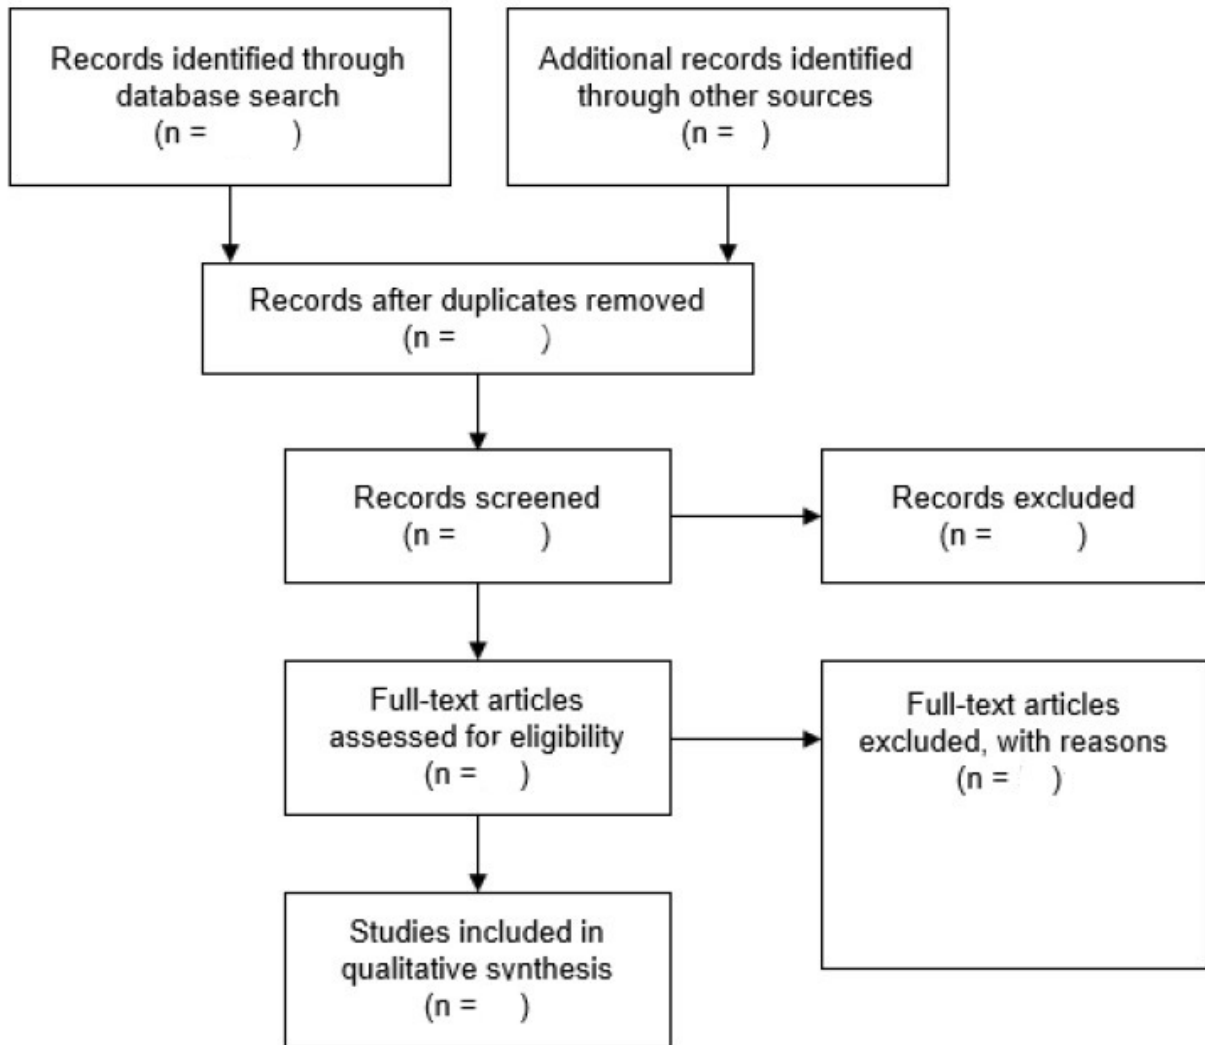

# Reporting checklist for protocol of a systematic review and meta analysis.

Based on the PRISMA-P guidelines.

## Instructions to authors

Complete this checklist by entering the page numbers from your manuscript where readers will find each of the items listed below.

Your article may not currently address all the items on the checklist. Please modify your text to include the missing information. If you are certain that an item does not apply, please write "n/a" and provide a short explanation.

Upload your completed checklist as an extra file when you submit to a journal.

In your methods section, say that you used the PRISMA-Preporting guidelines, and cite them as:

Moher D, Shamseer L, Clarke M, Ghersi D, Liberati A, Petticrew M, Shekelle P, Stewart LA. Preferred Reporting Items for Systematic Review and Meta-Analysis Protocols (PRISMA-P) 2015 statement. Syst Rev. 2015;4(1):1.

|                     |                     | Reporting Item                                                                                                                            | Page Number |
|---------------------|---------------------|-------------------------------------------------------------------------------------------------------------------------------------------|-------------|
| <b>Title</b>        |                     |                                                                                                                                           |             |
| Identification      | <a href="#">#1a</a> | Identify the report as a protocol of a systematic review                                                                                  | 1, 2        |
| Update              | <a href="#">#1b</a> | If the protocol is for an update of a previous systematic review, identify as such                                                        | N/A         |
| <b>Registration</b> |                     |                                                                                                                                           |             |
|                     | <a href="#">#2</a>  | If registered, provide the name of the registry (such as PROSPERO) and registration number                                                | 7           |
| <b>Authors</b>      |                     |                                                                                                                                           |             |
| Contact             | <a href="#">#3a</a> | Provide name, institutional affiliation, e-mail address of all protocol authors; provide physical mailing address of corresponding author | 1           |
| Contribution        | <a href="#">#3b</a> | Describe contributions of protocol authors and identify the guarantor of the review                                                       | 16          |

## Amendments

|                    |                                                                                                                                                                                                 |   |
|--------------------|-------------------------------------------------------------------------------------------------------------------------------------------------------------------------------------------------|---|
| <a href="#">#4</a> | If the protocol represents an amendment of a previously completed or published protocol, identify as such and list changes; otherwise, state plan for documenting important protocol amendments | 7 |
|--------------------|-------------------------------------------------------------------------------------------------------------------------------------------------------------------------------------------------|---|

## Support

|                           |                     |                                                                                                      |     |
|---------------------------|---------------------|------------------------------------------------------------------------------------------------------|-----|
| Sources                   | <a href="#">#5a</a> | Indicate sources of financial or other support for the review                                        | 16  |
| Sponsor                   | <a href="#">#5b</a> | Provide name for the review funder and / or sponsor                                                  | N/A |
| Role of sponsor or funder | <a href="#">#5c</a> | Describe roles of funder(s), sponsor(s), and / or institution(s), if any, in developing the protocol | N/A |

## Introduction

|            |                    |                                                                                                                                                          |     |
|------------|--------------------|----------------------------------------------------------------------------------------------------------------------------------------------------------|-----|
| Rationale  | <a href="#">#6</a> | Describe the rationale for the review in the context of what is already known                                                                            | 4-6 |
| Objectives | <a href="#">#7</a> | Provide an explicit statement of the question(s) the review will address with reference to participants, interventions, comparators, and outcomes (PICO) | 7   |

## Methods

|                                   |                      |                                                                                                                                                                                                                               |       |
|-----------------------------------|----------------------|-------------------------------------------------------------------------------------------------------------------------------------------------------------------------------------------------------------------------------|-------|
| Eligibility criteria              | <a href="#">#8</a>   | Specify the study characteristics (such as PICO, study design, setting, time frame) and report characteristics (such as years considered, language, publication status) to be used as criteria for eligibility for the review | 7-10  |
| Information sources               | <a href="#">#9</a>   | Describe all intended information sources (such as electronic databases, contact with study authors, trial registers or other grey literature sources) with planned dates of coverage                                         | 8-9   |
| Search strategy                   | <a href="#">#10</a>  | Present draft of search strategy to be used for at least one electronic database, including planned limits, such that it could be repeated                                                                                    | 20-21 |
| Study records - data management   | <a href="#">#11a</a> | Describe the mechanism(s) that will be used to manage records and data throughout the review                                                                                                                                  | 9     |
| Study records - selection process | <a href="#">#11b</a> | State the process that will be used for selecting studies (such as two independent reviewers) through each phase of the review (that is, screening, eligibility and inclusion in meta-analysis)                               | 9     |



|    |                      |                      |                                                                       |       |
|----|----------------------|----------------------|-----------------------------------------------------------------------|-------|
| 1  | Study records - data | <a href="#">#11c</a> | Describe planned method of extracting data from reports (such as      | 10    |
| 2  | collection process   |                      | piloting forms, done independently, in duplicate), any processes for  |       |
| 3  |                      |                      | obtaining and confirming data from investigators                      |       |
| 4  |                      |                      |                                                                       |       |
| 5  |                      |                      |                                                                       |       |
| 6  | Data items           | <a href="#">#12</a>  | List and define all variables for which data will be sought (such as  | 10-11 |
| 7  |                      |                      | PICO items, funding sources), any pre-planned data assumptions        |       |
| 8  |                      |                      | and simplifications                                                   |       |
| 9  |                      |                      |                                                                       |       |
| 10 |                      |                      |                                                                       |       |
| 11 | Outcomes and         | <a href="#">#13</a>  | List and define all outcomes for which data will be sought,           | 8     |
| 12 | prioritization       |                      | including prioritization of main and additional outcomes, with        |       |
| 13 |                      |                      | rationale                                                             |       |
| 14 |                      |                      |                                                                       |       |
| 15 |                      |                      |                                                                       |       |
| 16 |                      |                      |                                                                       |       |
| 17 | Risk of bias in      | <a href="#">#14</a>  | Describe anticipated methods for assessing risk of bias of individual | 11    |
| 18 | individual studies   |                      | studies, including whether this will be done at the outcome or study  |       |
| 19 |                      |                      | level, or both; state how this information will be used in data       |       |
| 20 |                      |                      | synthesis                                                             |       |
| 21 |                      |                      |                                                                       |       |
| 22 |                      |                      |                                                                       |       |
| 23 |                      |                      |                                                                       |       |
| 24 | Data synthesis       | <a href="#">#15a</a> | Describe criteria under which study data will be quantitatively       | 12-13 |
| 25 |                      |                      | synthesised                                                           |       |
| 26 |                      |                      |                                                                       |       |
| 27 |                      |                      |                                                                       |       |
| 28 | Data synthesis       | <a href="#">#15b</a> | If data are appropriate for quantitative synthesis, describe planned  | 12-13 |
| 29 |                      |                      | summary measures, methods of handling data and methods of             |       |
| 30 |                      |                      | combining data from studies, including any planned exploration of     |       |
| 31 |                      |                      | consistency (such as I <sup>2</sup> , Kendall's $\tau$ )              |       |
| 32 |                      |                      |                                                                       |       |
| 33 |                      |                      |                                                                       |       |
| 34 | Data synthesis       | <a href="#">#15c</a> | Describe any proposed additional analyses (such as sensitivity or     | 13    |
| 35 |                      |                      | subgroup analyses, meta-regression)                                   |       |
| 36 |                      |                      |                                                                       |       |
| 37 |                      |                      |                                                                       |       |
| 38 | Data synthesis       | <a href="#">#15d</a> | If quantitative synthesis is not appropriate, describe the type of    | 13    |
| 39 |                      |                      | summary planned                                                       |       |
| 40 |                      |                      |                                                                       |       |
| 41 |                      |                      |                                                                       |       |
| 42 | Meta-bias(es)        | <a href="#">#16</a>  | Specify any planned assessment of meta-bias(es) (such as              | 11    |
| 43 |                      |                      | publication bias across studies, selective reporting within studies)  |       |
| 44 |                      |                      |                                                                       |       |
| 45 |                      |                      |                                                                       |       |
| 46 | Confidence in        | <a href="#">#17</a>  | Describe how the strength of the body of evidence will be assessed    | 11    |
| 47 | cumulative           |                      | (such as GRADE)                                                       |       |
| 48 | evidence             |                      |                                                                       |       |
| 49 |                      |                      |                                                                       |       |
| 50 |                      |                      |                                                                       |       |

None The PRISMA-P elaboration and explanation paper is distributed under the terms of the Creative Commons Attribution License CC-BY. This checklist can be completed online using <https://www.goodreports.org/>, a tool made by the [EQUATOR Network](#) in collaboration with [Penelope.ai](#)
